1 **An *in vivo* reporter for tracking lipid droplet dynamics in transparent zebrafish**

2

3 Dianne Lumaquin<sup>1,2,\*</sup>, Eleanor Johns<sup>1,3,\*</sup>, Joshua Weiss<sup>1,2</sup>, Emily Montal<sup>1</sup>, Olayinka Ooladipupo<sup>1</sup>,  
4 Abderhman Abubashem<sup>2,4</sup>, Richard M. White<sup>1</sup>

5

6 <sup>1</sup>Cancer Biology and Genetics Program, Memorial Sloan Kettering Cancer Center, New York,  
7 NY, USA

8 <sup>2</sup>Weill Cornell/Rockefeller/Sloan Kettering Tri-Institutional MD-PhD Program, Memorial Sloan  
9 Kettering Cancer Center, New York, NY, USA

10 <sup>3</sup>Gerstner Sloan Kettering Graduate School of Biomedical Sciences, Memorial Sloan Kettering  
11 Cancer Center, New York, NY, USA

12 <sup>4</sup>Developmental Biology Program, Memorial Sloan Kettering Cancer Center, New York, NY,  
13 USA

14 \* These authors contributed equally to this work

15 **Abstract**

16 Lipid droplets are lipid storage organelles found in nearly all cell types from adipocytes to cancer  
17 cells. Although increasingly implicated in disease, current methods to study lipid droplets require  
18 fixation or static imaging which limits investigation of their rapid *in vivo* dynamics. To address this,  
19 we created a lipid droplet transgenic reporter in whole animals and cell culture by fusing  
20 tdTOMATO to Perilipin-2 (PLIN2), a lipid droplet structural protein. Expression of this transgene  
21 in transparent *casper* zebrafish enabled *in vivo* imaging of adipose depots responsive to nutrient  
22 deprivation and high-fat diet. Using this system, we tested novel regulators of lipolysis, revealing  
23 an unexpected role for nitric oxide in modulating adipocyte lipid droplets. Similarly, we expressed  
24 the PLIN2-tdTOMATO transgene in melanoma cells and found that the nitric oxide pathway also  
25 regulated lipid droplets in cancer. This model offers a tractable imaging platform to study lipid  
26 droplets across cell types and disease contexts.

## 27 **Introduction**

28 Lipid droplets are cellular organelles which act as storage sites for neutral lipids and are key  
29 regulators of cellular metabolism (Farese & Walther, 2009). Lipid droplets are present in most  
30 cell types and are characterized by a monophospholipid membrane surrounding a hydrophobic  
31 lipid core (Olzmann & Carvalho, 2019). Cells maintain energetic homeostasis and membrane  
32 formation through the regulated incorporation and release of fatty acids and lipid species from  
33 the lipid droplet core (Jarc & Petan, 2019; Olzmann & Carvalho, 2019). Importantly, lipid  
34 droplets can assume various functions during cellular stress through the sequestration of  
35 potentially toxic lipids and misfolded proteins, maintenance of energy and redox homeostasis,  
36 regulation of fatty acid transfer to the mitochondria for  $\beta$ -oxidation, and the maintenance of ER  
37 membrane homeostasis (Olzmann & Carvalho, 2019; Petan et al., 2018). Moreover, recent work  
38 demonstrated that lipid droplets actively participate in the innate immune response (Bosch et al.,  
39 2020), and conversely, can be hijacked by infectious agents like hepatitis C virus to facilitate  
40 viral replication (Barba et al., 1997; Miyanari et al., 2007; Vieyres et al., 2020). The role of lipid  
41 droplets in metabolic homeostasis and cellular stress is critical across multiple cell types and  
42 has also been increasingly implicated in cancer (Petan et al., 2018). For example, lipid droplets  
43 can act as a storage pool in cancer cells after they take up lipids from extracellular sources,  
44 including adipocytes (Kuniyoshi et al., 2019; Nieman et al., 2011; Zhang et al., 2018).

45  
46 While lipid droplets are ubiquitous across most cell types, they are essential to the function of  
47 adipocytes in regulating organismal energy homeostasis (Jarc & Petan, 2019). White adipocytes  
48 contain a large unilocular lipid droplet that is tightly regulated to mobilize fatty acids from the  
49 lipid droplet core (Heid et al., 2014; Zechner et al., 2017). Activation of lipolysis releases free  
50 fatty acids from the adipocyte lipid droplet which can be used by surrounding, non-adipose cell  
51 types to fuel energy production (Schoiswohl et al., 2010; Zimmermann et al., 2004).

52 Dysregulation of lipid droplet function has been linked to a variety of pathophysiologies namely

53 obesity (Olzmann & Carvalho, 2019). In addition, mutations in lipases required for lipolysis can  
54 lead to increased fat deposition and systemic metabolic abnormalities (Ahmadian et al., 2011;  
55 Haemmerle et al., 2006; Schoiswohl et al., 2010) in mouse models as well as the development  
56 of neutral lipid storage disease in humans (Fischer et al., 2007).

57

58 *In vivo* imaging of lipid droplets, either in adipocytes or in other cell types, is currently highly  
59 limited. Understanding these dynamics *in vivo*, rather than in fixed tissues, is important since the  
60 size of the lipid droplet can change very rapidly in response to fluctuating metabolic needs  
61 (Bosch et al., 2020; Fam et al., 2018). Much of adipose tissue imaging utilizes tissue fixation  
62 and sectioning, which can fail to preserve key aspects of the tissue structure (Berry et al., 2014;  
63 Xue et al., 2010). Whole mount imaging approaches in mice can be combined with adipocyte  
64 specific promoters, however, these methods still require tissue dissection and can be limited by  
65 tissue thickness (Berry & Rodeheffer, 2013; Chi et al., 2018).

66

67 Zebrafish offer a tractable model to address these limitations given the ease of high-throughput  
68 imaging of live animals. This is especially true with the availability of relatively transparent  
69 strains such as *casper*, which allow for detailed *in vivo* imaging without the need for fixation of  
70 the animal (White et al., 2008). Although less well studied than other vertebrates, zebrafish  
71 adipose tissue is highly similar to mammalian white adipose tissue and detailed work has  
72 classified the timing, dynamics, and location of zebrafish adipose tissue development (Minchin  
73 & Rawls, 2017). However, until now, the study of zebrafish adipose tissue has been limited to  
74 the use of lipophilic fluorescent dyes, which are restricted in their ability to read out dynamic  
75 changes over long periods of time (Fam et al., 2018).

76

77 Here, we report the development of an *in vivo* lipid droplet reporter using a *plin2-tdtomato*  
78 transgene in the *casper* strain. To date, transgenic lipid droplet reporters have been restricted to

79 invertebrate model organisms such as *C. Elegans* and *Drosophila* (Kühnlein, 2011; Liu et al.,  
80 2014). We demonstrate that the reporter faithfully marks the lipid droplet which enables robust  
81 *in vivo* imaging. We show that this reporter can be applied to visualize adipocytes and to  
82 monitor adipose tissue remodeling in response to dietary and pharmacologic perturbations.  
83 Furthermore, we report the discovery of novel pharmacologic regulators of adipocyte lipolysis  
84 such as nitric oxide and demonstrate that several of these compounds can modulate adipose  
85 tissue area in our *in vivo* system. To facilitate the study of lipid droplets in novel contexts outside  
86 of adipocytes, we also generated a zebrafish melanoma cell line (ZMEL) (Heilmann et al., 2015)  
87 expressing *plin2-tdtomato* (ZMEL-LD). We confirm that this cell line can be used to monitor  
88 changes in lipid droplet production in response to both known and novel regulators of lipolysis.  
89 We anticipate that these models will be highly valuable as a high-throughput imaging platform to  
90 investigate lipid droplets in both adipose tissue biology as well as disease contexts such as  
91 cancer.

## 92 **Results**

### 93 **An *in vivo* lipid droplet reporter using a PLIN2-tdTOMATO fusion transgene**

94 To create a specific, fluorescent reporter for lipid droplets in zebrafish, we fused *tdtomato* to the  
95 3' end of the *plin2* cDNA. We chose *plin2* because it is a well-known lipid droplet associated  
96 protein that is ubiquitously expressed on lipid droplets across cell types (Olzmann & Carvalho,  
97 2019). We generated stable transgenic zebrafish expressing *ubb:plin2-tdtomato* and sought to  
98 validate whether the construct faithfully marks lipid droplets (Figure 1A). White adipocytes are  
99 fat cells known for their large unilocular lipid droplet (T. Fujimoto & Parton, 2011; Heid et al.,  
100 2014) so we expected expression of the PLIN2-tdTOMATO fusion protein on the surface of the  
101 adipocyte lipid droplet (Figure 1A). Since the adipocyte lipid droplet occupies the majority of  
102 space in the cell (M. Fujimoto et al., 2020), existing methods to visualize zebrafish adipocytes  
103 rely on lipophilic dyes and lipid analogs which incorporate in the lipid droplet (Zhang et al.,  
104 2018). Thus in addition to labeling individual lipid droplets, we reasoned that the PLIN2-  
105 tdTOMATO fusion protein can also function as a reporter for adipocytes since these cells would  
106 have the largest and unilocular lipid droplets.

107  
108 In adult zebrafish, subcutaneous adipocytes are known to reside proximally to the tail fin  
109 (Minchin & Rawls, 2017). When we imaged six month old adult *tg(ubb:plin2-tdtomato)* zebrafish,  
110 we detected PLIN2-tdTOMATO expression in the zebrafish tail fin adipocytes which colocalizes  
111 with BODIPY staining (Figure 1B, C). Lipophilic dyes such as BODIPY stain the lipid-rich core of  
112 the lipid droplet while lipid droplet resident proteins, such as PLIN2, localize to the lipid droplet  
113 membrane (Zhang et al., 2018). As expected, higher magnification images of tail adipocytes  
114 revealed that PLIN2-tdTOMATO expression was on the outside of the lipid droplet, whereas the  
115 BODIPY staining was on the interior of each droplet in the adipocyte (Figure 1D). Similarly,  
116 immunohistochemistry on the *tg(ubb:plin2-tdtomato)* zebrafish tail fin showed that adipocytes  
117 express tdTOMATO (Figure 1E). Taken together, this data demonstrates that the PLIN2-

118 tdTOMATO fusion protein functions as a fluorescent lipid droplet reporter which can be applied  
119 to visualize adipocytes *in vivo*.

120

### 121 **The *tg(ubb:plin2-tdtomato)* is an *in vivo* reporter for visceral adipocytes**

122 Visceral adipose tissue, otherwise known as abdominal fat, plays an important role in  
123 metabolism and participates in pathological processes of obesity, aging and metabolic  
124 syndromes (Tchernof & Després, 2013). Because PLIN2-tdTOMATO labeled subcutaneous  
125 adipocytes in the adult zebrafish tail fin, we wondered whether we could use the *tg(ubb:plin2-*  
126 *tdtomato)* zebrafish to visualize other adipose depots *in vivo* such as visceral adipocytes. In  
127 juvenile zebrafish at 21 days post-fertilization (dpf), visceral adipose tissue is composed of  
128 abdominal and pancreatic visceral adipocytes predominantly located on the right flank near the  
129 swim bladder (Figure 2A) (Minchin & Rawls, 2017). To determine whether *tg(ubb:plin2-*  
130 *tdtomato)* visceral adipocytes express PLIN2-tdTOMATO, we imaged around the swim bladder  
131 of juvenile zebrafish where we expect development of abdominal visceral adipocytes (Figure  
132 2B). Visceral adipocytes visualized in brightfield co-stain for PLIN2-tdtomato and BODIPY, as  
133 we observed for subcutaneous adipocytes (Figure 2C). Immunohistochemistry of the juvenile  
134 *tg(ubb:plin2-tdtomato)* confirmed that the abdominal and visceral adipocytes express  
135 tdTOMATO (Figure 2D). Combined with the ability for high-throughput *in vivo* imaging in  
136 zebrafish, we sought to use *tg(ubb:plin2-tdtomato)* as a model to study lipid droplet dynamics in  
137 visceral adipocytes. One challenge we encountered was the auto-fluorescence from the  
138 zebrafish intestinal loops and gallbladder present in the tdTOMATO and GFP channels (Figure  
139 2E). To remove background fluorescence, we developed an image analysis pipeline in MATLAB  
140 to segment the visceral adipocytes in the juvenile *tg(ubb:plin2-tdtomato)* (Figure 2E). Thus,  
141 *tg(ubb:plin2-tdtomato)* can be used as an *in vivo* model to visualize adipocytes with the benefits  
142 of avoiding staining steps and allowing for high-throughput image analysis in zebrafish.

143 **Diet and pharmacologically induced reduction in visceral adipose tissue area**

144 After confirming that we could image visceral adipose tissue in *tg(ubb:plin2-tdtomato)*, we  
145 wanted to test whether this could be a tractable platform to image adipose tissue remodeling.  
146 We first verified whether we could use *tg(ubb:plin2-tdtomato)* to track reduction in visceral  
147 adiposity. Fasting is a well-known mechanism for reducing adiposity, since it will induce lipolysis  
148 and lead to a reduction in the size of the adipocyte lipid droplet (Henne et al., 2018; Longo &  
149 Mattson, 2014; Rambold et al., 2015; Tang et al., 2017). To test this, juvenile zebrafish were  
150 given control feed or fasted for 2.5 days then imaged to measure standard length and adipose  
151 tissue area (Figure 3A). As expected, we observed a reduction in the segmented adipocyte area  
152 in the fasted zebrafish (Figure 3B). Using our image analysis pipeline, we measured a  
153 significant reduction in adipose tissue area with an average of  $0.39 \pm 0.03 \text{ mm}^2$  for fed fish and  
154  $0.21 \pm 0.03 \text{ mm}^2$  for fasted fish (Figure 3C). The control fed fish had a longer average standard  
155 length compared to the fasted fish ( $9.76 \pm 0.18 \text{ mm}$  vs  $8.73 \pm 0.17 \text{ mm}$ ) which we attribute to  
156 food restriction disrupting zebrafish development during this developmental window (Figure 3D).  
157 We saw a similar reduction in fasted fish when normalizing adipose tissue area to standard  
158 length, similar to a Body Mass Index (BMI) in mammals (control feed =  $0.040 \pm 0.003 \text{ area/SL}$   
159 and fasted =  $0.024 \pm 0.003 \text{ area/SL}$ ) (Figure 3E).

160

161 In addition to fasting as a dietary perturbation, we also pharmacologically reduced adipose  
162 tissue. To achieve this, we used Forskolin, a drug which is known to induce lipolysis through  
163 cAMP signaling (Litosch et al., 1982). We treated juvenile zebrafish for 24 hours with either  
164 DMSO or 5  $\mu\text{M}$  Forskolin and imaged the adipocytes (Figure 3F). We detected a reduction in  
165 both the adipose tissue area and normalized area to standard length in the Forskolin treated  
166 fish, but no differences in standard length (Figure 3G, H, I). Altogether, this data suggests that  
167 our PLIN2-tdTOMATO reporter faithfully reads out changes in the size of adipose tissue due to  
168 its capacity to sensitively detect lipolysis of the large lipid droplet in this tissue.



169

## 170 **High-fat diet leads to specific enlargement of visceral adipose tissue**

171 Having shown that we could use *tg(ubb:plin2-tdtomato)* to image and measure reduction in  
172 adipose tissue, we tested whether we can use our model to detect an increase in adiposity.  
173 Zebrafish have been used as a model for diet-induced obesity and share pathophysiological  
174 perturbations seen in mammals, but few studies have focused on architectural changes of  
175 visceral adipose tissue (Chu et al., 2012; Landgraf et al., 2017; Oka et al., 2010). We sought to  
176 determine if we could detect increases in visceral adiposity from a high fat diet (HFD). We fed  
177 juvenile zebrafish with either control feed (12% crude fat) or HFD (23% crude fat) for 7 days and  
178 subsequently imaged the adipose tissue (Figure 4A, B). Remarkably after a week of HFD  
179 feeding, we observed that HFD fed fish developed notably increased visceral adiposity  
180 compared to the fish fed with control feed (Figure 4C). Quantification of the adipose tissue  
181 revealed that HFD led to an increase in adipose tissue area (control feed  $0.42 \pm 0.03 \text{ mm}^2$  and  
182 HFD =  $0.62 \pm 0.03 \text{ mm}^2$ ) and normalized area to standard length (control feed =  $0.040 \pm 0.002$   
183 area/SL and HFD =  $0.061 \pm 0.002$  area/SL) (Figure 4D, F). Interestingly, we did not detect  
184 differences in the standard length of the fish (control feed =  $10.09 \pm 0.11 \text{ mm}$  and HFD =  $10.13$   
185  $\pm 0.11 \text{ mm}$ ), suggesting that this formulation of HFD leads to specific enlargement of visceral  
186 adipose tissue (Figure 4E). Our results demonstrate that *tg(ubb:plin2-tdtomato)* is an effective  
187 and unique tool to visualize visceral adipose tissue remodeling induced by HFD which can be  
188 widely applied to study obesity.

189

## 190 **A screen to discover novel compounds that modulate lipolysis and lipid droplets *in vivo***

191 To meet fluctuating nutritional needs of the cell, lipid droplets are remodeled through lipolysis to  
192 regulate lipid mobilization and metabolic homeostasis (Krahmer et al., 2013; Olzmann &  
193 Carvalho, 2019; Paar et al., 2012). As a major lipid depot for the body, white adipose tissue is  
194 critical to lipid availability and cycles through lipolytic flux in response to energy demands

195 (Duncan et al., 2007). In disease contexts such as cancer, adipocytes undergoing lipolysis act  
196 as a lipid source for neighboring cancer cells (Lengyel et al., 2018). Adipocyte-derived lipids  
197 have been directly shown to promote cancer progression in ovarian (Nieman et al., 2011),  
198 breast (Balaban et al., 2017), and melanoma cancer cells (Zhang et al., 2018). Due to growing  
199 evidence of adipocyte and cancer cell cross-talk as a metabolic adaptation for tumor  
200 progression, there is significant interest in disrupting lipid transfer between adipocytes and  
201 cancer cells.

202  
203 Leveraging our model to visualize lipid droplets in adipocytes, we became interested in  
204 identifying novel compounds that remodel adipocyte lipid droplets through lipolysis. In  
205 mammalian systems, the most commonly used cell line to study lipolysis are 3T3-L1 cells, which  
206 can be differentiated *in vitro* to resemble adipocytes (Zebisch et al., 2012). We first used the  
207 3T3-L1 system to rapidly identify lipolysis inhibitors at high-throughput, and then test those hits  
208 using our zebrafish lipid droplet reporter. We reasoned that compounds which inhibit lipolysis *in*  
209 *vitro* would cause an increase in the size of the lipid droplets *in vivo*. To achieve this, we  
210 differentiated mouse 3T3-L1 fibroblast cells into adipocytes and conducted a chemical screen  
211 for compounds that inhibit lipolysis (Figure 5A), measured by quantifying glycerol in the media, a  
212 gold standard readout of lipolysis in this system (Hellmér et al., 1989). As a positive control, we  
213 used Atglistatin, an inhibitor of adipose triglyceride lipase (ATGL) which is known to be the rate  
214 limiting step of lipolysis and has been shown to inhibit lipolysis in cell lines and mouse models  
215 (Mayer et al., 2013; Schweiger et al., 2017). We confirmed that Atglistatin potently inhibits  
216 lipolysis in 3T3-L1 adipocytes (Figure 5B). We then screened through a library of 1,280  
217 compounds of diverse chemical structures to find novel inhibitors of lipolysis. Overall, we found  
218 29 out of 1,280 compounds which led to at least a 40% reduction in lipolysis as measured by  
219 glycerol release into the media. Looking more closely at the top 10 hits from this screen, we  
220 noted that 2 of the top 10 top hits (Auranofin and JS-K), both modulated nitric oxide (Figure 5A).

221 Nitric oxide can be used for post-translational modification of proteins via S-nitrosylation  
222 (Stamler et al., 2001). Previous work has shown that increased nitric oxide has a suppressive  
223 role on lipolysis, and Auranofin, a thioredoxin reductase inhibitor that promotes S-nitrosylation,  
224 can inhibit lipolysis in 3T3-L1 cells (Yamada et al., 2015). Similarly, JS-K is a nitric oxide donor  
225 purported to promote S-nitrosylation, but it has not been shown to play a role in lipolysis (Nath  
226 et al., 2010; Shami et al., 2003). Given that both of these top hits were in the same pathway, we  
227 chose these for *in vivo* validation. We asked whether these drugs could modulate lipid droplet  
228 size and lead to increased adiposity in the zebrafish. We treated juvenile zebrafish for 24 hours  
229 with DMSO, Atglistatin, Auranofin, or JS-K and imaged the adipose tissue. We found that  
230 Atglistatin and JS-K significantly increase adipose tissue area and normalized area to standard  
231 length (Figure 5C, E). These effects were specific to the adipose tissue as standard length was  
232 not affected (Figure 5D). These data indicate that modulators of nitric oxide can inhibit lipolysis  
233 in cell lines, which then leads to an increase in adipose tissue area *in vivo* in the zebrafish.  
234 Moreover, this approach demonstrates the power of this system to dissect the relationship  
235 between novel modulators of lipolysis (i.e. nitric oxide) and adiposity *in vivo*.

236

### 237 **Lipolysis modulators also inhibit lipid droplet loss in melanoma cells**

238 Upon uptake of adipocyte-derived lipids, cancer cells can store excess lipids in lipid droplets  
239 (Lengyel et al., 2018). Accumulation of lipid droplets in melanoma cells has been associated  
240 with increased metastatic potential and worse clinical outcomes (M. Fujimoto et al., 2020; Zhang  
241 et al., 2018). The mechanisms regulating subsequent lipolysis from the lipid droplets in cancer  
242 cells are not well understood, but we reasoned that some of the same mechanisms (i.e. ATGL,  
243 nitric oxide) used in adipocytes might also be used in cancer cells. To test this, we created a  
244 stable zebrafish melanoma cell line (ZMEL) that expressed the *ubb:plin2-tdtomato* construct  
245 (Heilmann et al., 2015) to generate the ZMEL-LD (lipid droplet) reporter cell line (Figure 6A).  
246 Because melanoma cells at baseline only have few small lipid droplets, we induced their

247 formation via extrinsic addition of oleic acid, a key fatty acid that can be transferred from the  
248 adipocyte to the melanoma cell (Zhang et al., 2018). We found that after a pulse of oleic acid for  
249 24 hours, we could easily detect PLIN2-tdTOMATO expression surrounding lipid droplets  
250 marked by the lipid droplet dye MDH (Figure 6B). A 3D reconstruction demonstrated that PLIN2-  
251 tdTOMATO was strictly expressed on the outline of the lipid droplet core, consistent with  
252 endogenous PLIN2 protein expression patterns (Olzmann & Carvalho, 2019) (Movie 1) and  
253 similar to what we saw in the adipocytes (Figure 1).

254

255 To validate whether lipolysis inhibiting compounds could modulate lipid droplets in the ZMEL-LD  
256 cells, we utilized flow cytometry to measure PLIN2-tdTOMATO expression. We treated ZMEL-  
257 LD cells for 72 hours with either BSA or oleic acid as controls for low or high lipid droplet cell  
258 populations (Figure 6C), which confirmed the ability of the transgene to read out lipid droplets in  
259 this assay. We then tested the effects of the lipolysis inhibitors described above. We pulsed the  
260 ZMEL-LD cells with oleic acid for 24 hours (to induce lipid droplets) and then measured the  
261 subsequent decay in signal over the ensuing 48 hours, which is expected to decrease due to  
262 gradual lipolysis of the lipid droplets. Compared to cells with oleic acid pulse and DMSO ( $58.5 \pm$   
263  $1.4\%$  LD+ cells), cells given JS-K ( $58.3 \pm 1.2\%$  LD+ cells) did not differ in the percent of lipid  
264 droplet positive cells (Figure 6D, E). In contrast, cells treated with Atglistatin ( $66.7 \pm 1.4\%$  LD+  
265 cells) and Auranofin ( $69.1 \pm 2.1\%$  LD+ cells) demonstrated significantly higher lipid droplet  
266 positive cells (Figure 6D, E). These data indicate that similar to adipocytes, ATGL is a key  
267 regulatory step in lipolysis in the melanoma cells. Moreover, we find that nitric oxide, which was  
268 identified in our adipocyte screen, is similarly a modulator of lipolysis in the melanoma context  
269 and can be utilized for future studies to target adipocyte-melanoma cell cross-talk. We do not  
270 yet understand why different nitric oxide donors are more or less potent in adipocytes (where  
271 JS-K is a better inhibitor *in vivo*) versus melanoma cells (where Auranofin is a better inhibitor),  
272 but this could reflect differences in pharmacokinetics between the two cell types.

273

## 274 **Discussion**

275 Lipid droplets are cytosolic storage organelles for cellular lipids which are dynamically regulated  
276 in response to metabolic and oxidative perturbations (Jarc & Petan, 2019). For instance, under  
277 hypoxic conditions, lipid droplets are crucial for protecting cells against reactive oxygen species  
278 and lipid peroxidation (Bailey et al., 2015; Bensaad et al., 2014). Lipid droplets can also buffer  
279 ER stress by sequestering excess lipids and proteins in the lipid droplet core (Chitraju et al.,  
280 2017; Velázquez et al., 2016; Vevea et al., 2015) while fluctuations in nutrient availability have  
281 been shown to lead to changes in lipid droplet biogenesis (Cabodevilla et al., 2013; Nguyen et  
282 al., 2017). The regulatory mechanisms driving these processes remain incompletely  
283 understood. Furthermore, lipid droplets are highly heterogeneous and the pathways which  
284 regulate lipid droplet dynamics in specific cell types warrant investigation.

285

286 To address such questions, we developed the first lipid droplet reporter in a vertebrate model  
287 organism. We show that our *plin2-tdtomato* reporter faithfully marks the lipid droplet *in vivo*. The  
288 combination of this reporter with the *in vivo* system of the *casper* zebrafish enables flexible and  
289 robust imaging approaches to examine lipid droplet regulation and function. In particular, the  
290 ease of chemical and genetic manipulation of the zebrafish combined with high-throughput  
291 imaging approaches enables interrogation of relevant pathways in a cell type specific manner.  
292 Furthermore, the capacity for intravital imaging creates the opportunity to conduct longitudinal  
293 analysis of lipid droplet dynamics across developmental time and in disease contexts between  
294 single animals.

295

296 Here, we demonstrate the capabilities of the *tg(ubb:plin2-tdtomato)* line by taking advantage of  
297 the fact that white adipocytes, which are primarily composed of a large unilocular lipid droplet  
298 (T. Fujimoto & Parton, 2011), are readily labeled by PLIN2-tdTOMATO expression. This labeling

299 enables the study of individual adipocytes and adipose tissue in adult and juvenile zebrafish.  
300 We utilized this system to develop a robust imaging platform to specifically study the regulation  
301 of adipose tissue using both diet and pharmacologic perturbation. We focused on visceral  
302 adipose tissue due to its role as an endocrine organ and central regulator of organismal  
303 metabolism. Importantly, visceral adipose tissue accumulation, such as in obesity, influences  
304 the development of disorders including insulin resistance, cardiovascular disease, and  
305 hypertension (Fox et al., 2007; Le Jemtel et al., 2018; Verboven et al., 2018). We use our image  
306 analysis pipeline to demonstrate that our model is sensitive to diet induced changes in visceral  
307 adiposity. We also show that established chemical regulators of adipocyte lipolysis, Forskolin  
308 and Atglistatin, can produce quantitative changes in visceral adipose tissue. Collectively, these  
309 data illustrate the potential of our model to yield novel insights into the regulation of visceral  
310 adipose tissue, including in the context of obesity.

311  
312 Although adipocytes comprise a major portion of adipose tissue, adipose tissue also consists of  
313 the stromal vascular fraction composed of fibroblasts, endothelial, and immune cells (Rosen &  
314 Spiegelman, 2014). Remodeling of adipose tissue architecture through changes in  
315 vascularization or recruitment of immune cells during tissue inflammation is associated with  
316 metabolic diseases including obesity and insulin resistance (Rosen & Spiegelman, 2014). Given  
317 the complexity of adipose tissue organization, understanding the native tissue architecture in  
318 relevant contexts is essential. We anticipate that our reporter can be easily crossed with other  
319 zebrafish transgenic reporters of interest to visualize heterotypic cell-cell interactions within  
320 adipose tissue.

321  
322 While our studies show that this tool can be readily used to increase our understanding of  
323 adipocyte biology, it can also be utilized to study lipid droplets in other contexts as well.

324 Lipid droplets are ubiquitous across almost all cell types. Therefore, this model could be applied  
325 to study the regulation of lipid droplets in the development and function of other adipose depots  
326 and additional cell types, such as muscle and hepatocytes (Bosma, 2016; Wang et al., 2013). In  
327 the disease context, we focused on the role of lipid droplets in cancer, since they have been  
328 implicated in various tumor types (Petan et al., 2018) where tumor cells can take up lipids from  
329 adipocytes and then package them into lipid droplets in the cancer cell (Balaban et al., 2017;  
330 Lengyel et al., 2018; Nieman et al., 2011; Zhang et al., 2018). This transfer of lipids has been  
331 linked to disease progression, making the regulation of lipid release from the lipid droplet  
332 through subsequent lipolysis in the tumor cell of particular interest. By expressing the *plin2-*  
333 *tdtomato* transgene in the ZMEL melanoma cells, we find that key regulators of lipolysis, such  
334 as ATGL and nitric oxide are mechanisms conserved with normal adipocytes. Interestingly, our  
335 results suggest that while the nitric oxide pathway can alter both adipose tissue area and lipid  
336 droplet content in melanoma cells, there may be differences between the phenotypes induced  
337 by nitric oxide production compared to more downstream effects such as S-nitrosylation, which  
338 are cell type specific. Collectively, this underscores the complexity of lipid droplet regulation and  
339 emphasizes the importance of studying these processes in both cell types. We believe that our  
340 model will serve as a powerful tool to study cell type specific regulation of lipid droplet  
341 biogenesis and function while preserving the endogenous structural and metabolic environment  
342 of an *in vivo* system.

343

344 **Acknowledgements**

345 We thank members at the Memorial Sloan Kettering Cancer Center Aquatics Core, Molecular  
346 Cytology Core, and Flow Cytometry Core for their contributions to this work. We thank Dr.  
347 Mohita Tagore and Dr. Ting-Hsiang (Richard) Huang for comments on the project and  
348 manuscript.

349

350 **Competing Interests**

351 D.L., E.J., J.W., E.M., O.O., and A.A. do not have competing interests to declare. R.M.W is a  
352 paid consultant to N-of-One Therapeutics, a subsidiary of Qiagen. R.M.W is on the scientific  
353 advisory board of Consano, but receives no income for this. R.M.W receives royalty payments  
354 for the use of the *casper* zebrafish line from Carolina Biologicals.



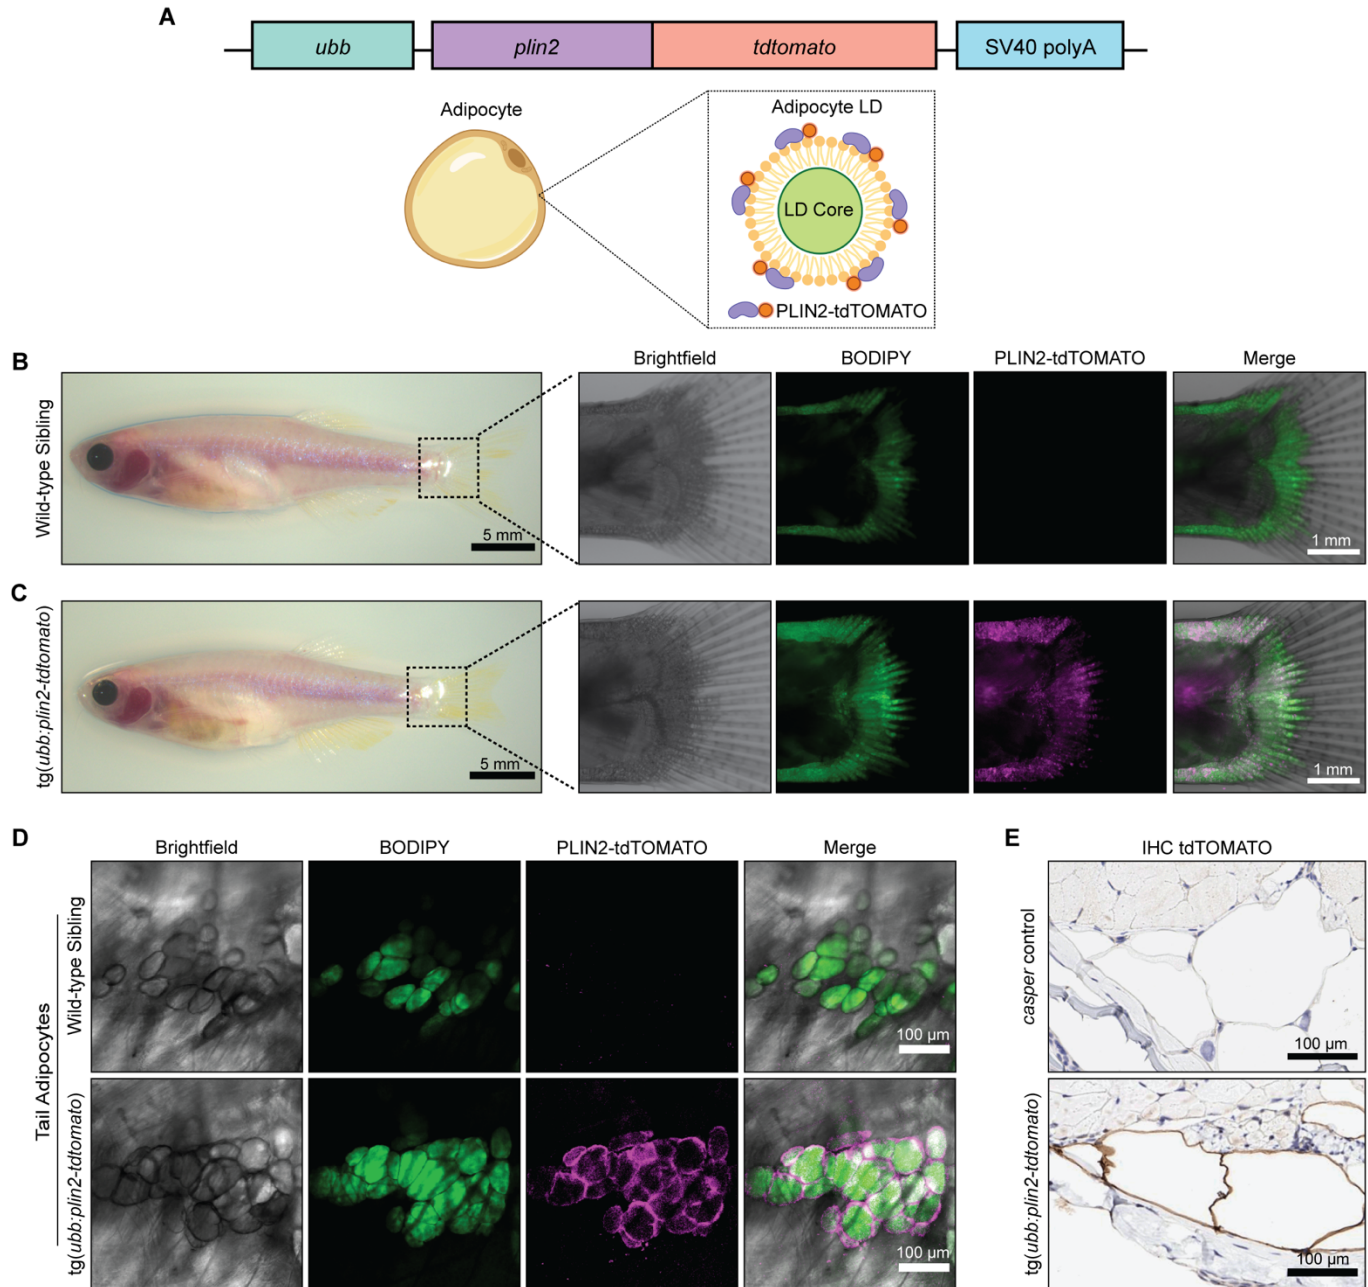

355 **Figure 1: An *in vivo* lipid droplet reporter using a PLIN2-tdTOMATO fusion transgene**

356

357 (A) Schematic of *ubb:plin2-tdtomato* construct injected into zebrafish and adipocyte lipid droplet  
 358 labeled with PLIN2-tdTOMATO fusion protein. Widefield microscope images of adult (B) wild-type  
 359 sibling and (C) *tg(ubb:plin2-tdtomato)* zebrafish. Box shows zoomed images of the fish tail with  
 360 panels for brightfield, BODIPY, PLIN2-tdTOMATO, and merged. (D) Confocal images of fish tail  
 361 adipocytes of adult wild-type sibling and *tg(ubb:plin2-tdtomato)* zebrafish. Panels show brightfield,  
 362 BODIPY, PLIN2-tdTOMATO, and merge. (E) Adult *casper* and *tg(ubb:plin2-tdtomato)* zebrafish  
 363 tails were fixed and immunohistochemistry conducted for tdTOMATO expression of tail  
 364 adipocytes.

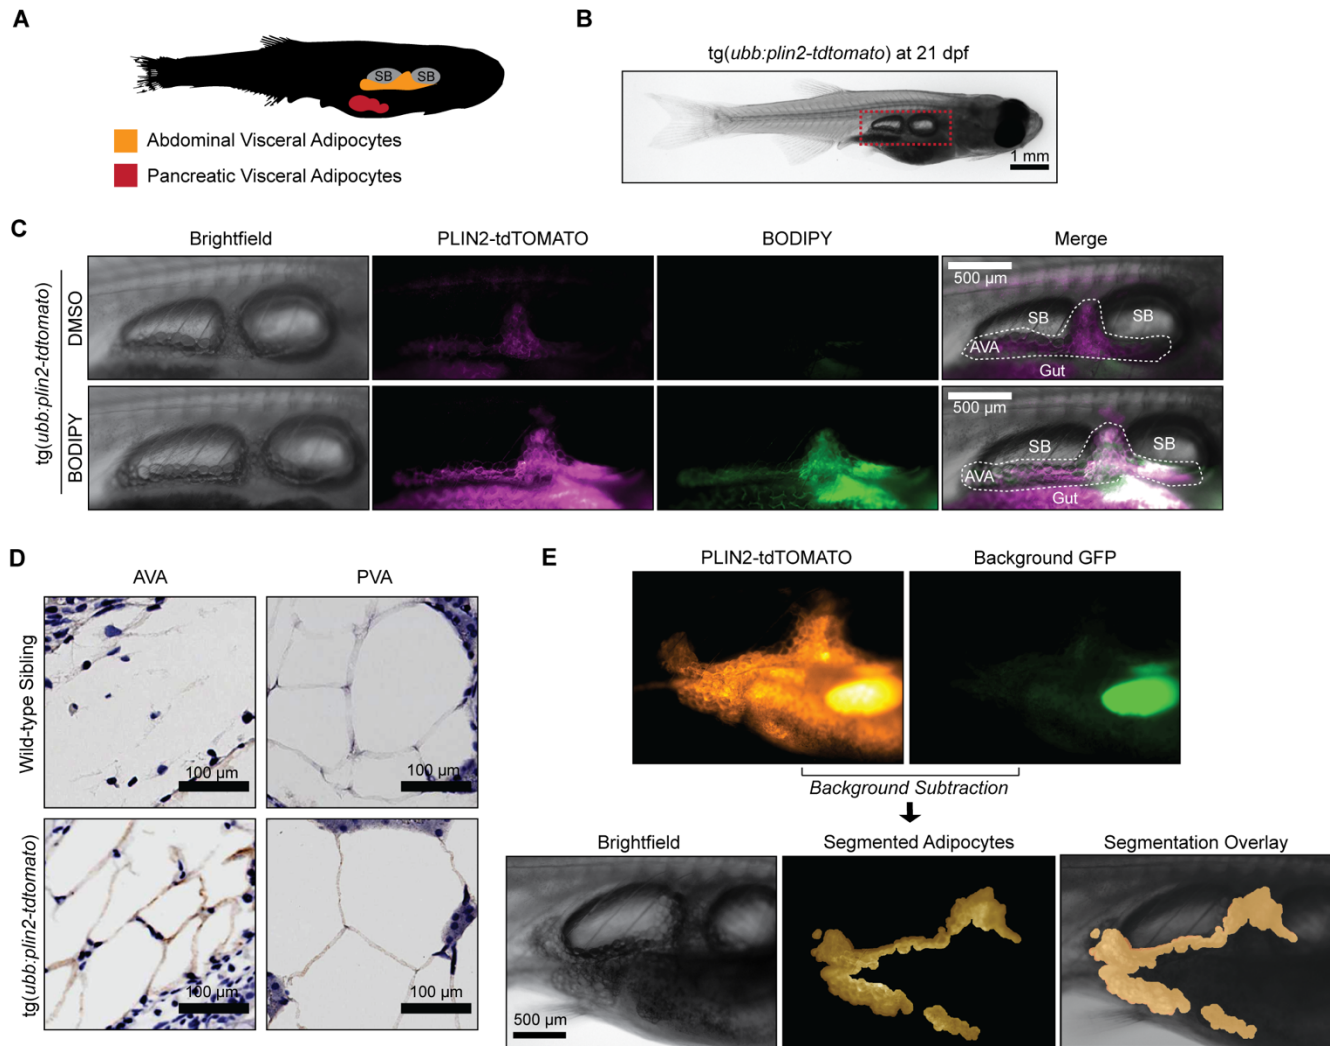

365 **Figure 2: The *tg(ubb:plin2-tdtomato)* is an *in vivo* reporter for visceral adipocytes**

366  
 367 (A) Schematic of visceral adipose tissue development in the juvenile zebrafish. Abdominal  
 368 visceral adipocytes (orange) develop around the swim bladder (gray) and pancreatic visceral  
 369 adipocytes (red) develop ventrally around the pancreas. (B) Brightfield image of juvenile  
 370 *tg(ubb:plin2-tdtomato)* at 21 dpf. Red box indicates position of higher magnification images to  
 371 visualize abdominal visceral adipocytes. (C) Widefield microscope images of juvenile  
 372 *tg(ubb:plin2-tdtomato)* visceral adipocytes co-stained with DMSO or BODIPY. Panels show  
 373 brightfield, PLIN2-tdTOMATO, BODIPY, and merge. Visceral adipocytes marked with white dash  
 374 surrounding the swim bladder (SB) and gut. (D) Juvenile wild-type sibling and *tg(ubb:plin2-*  
 375 *tdtomato)* zebrafish were fixed and immunohistochemistry conducted for tdTOMATO expression  
 376 of abdominal (AVA) and pancreatic (PVA) visceral adipocytes. (E) Representative image of  
 377 computational segmentation of juvenile *tg(ubb:plin2-tdtomato)* adipocytes. PLIN2-tdTOMATO  
 378 was background subtracted with GFP fluorescence. Bottom panels show brightfield, segmented  
 379 adipocytes, and segmentation overlaid on brightfield.

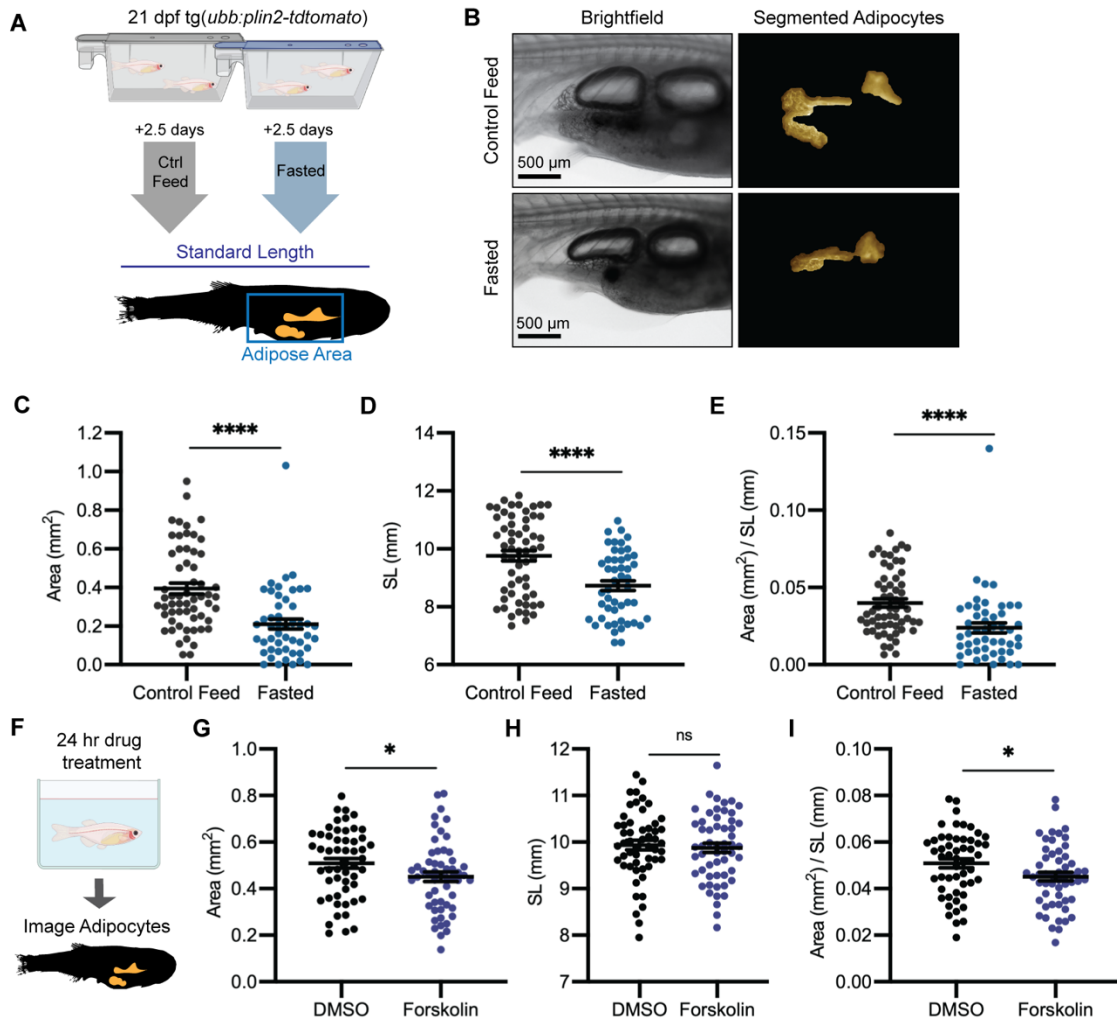

380 **Figure 3: Diet and pharmacologically induced reduction in visceral adipose tissue area**

381  
 382 (A) Schematic of experimental set-up for fasting experiment. 21 dpf *tg(ubb:plin2-tdtomato)* were  
 383 fed control feed or fasted for 2.5 days and imaged to measure standard length and adipose area.  
 384 (B) Representative images of zebrafish given control feed or fasted. Panels show images in  
 385 brightfield and adipocyte segmentation. Image analysis pipeline resulted in measurements of  
 386 adipose tissue (C) area, (D) standard length, and (E) area/standard length. Data points indicate  
 387 individual fish for N = 4 independent experiments; Control feed n = 49; Fasted n = 59. Bars  
 388 indicate mean and SEM. Significance calculated via Mann-Whitney test; \*\*\*\* p < 0.0001. (F)  
 389 Schematic of experimental set-up for Forskolin drug treatment. 21 dpf *tg(ubb:plin2-tdtomato)* were  
 390 individually placed in 6 well plates with either DMSO or 5 μM Forskolin for 24 hours. Adipose  
 391 tissue was imaged and analyzed for (G) area, (H) standard length, and (I) area/standard length.  
 392 Data points indicate individual fish for N = 5 independent experiments; DMSO n = 53; Forskolin n  
 393 = 55. Bars indicate mean and SEM. Significance calculated via Mann-Whitney test; \* p < 0.05.

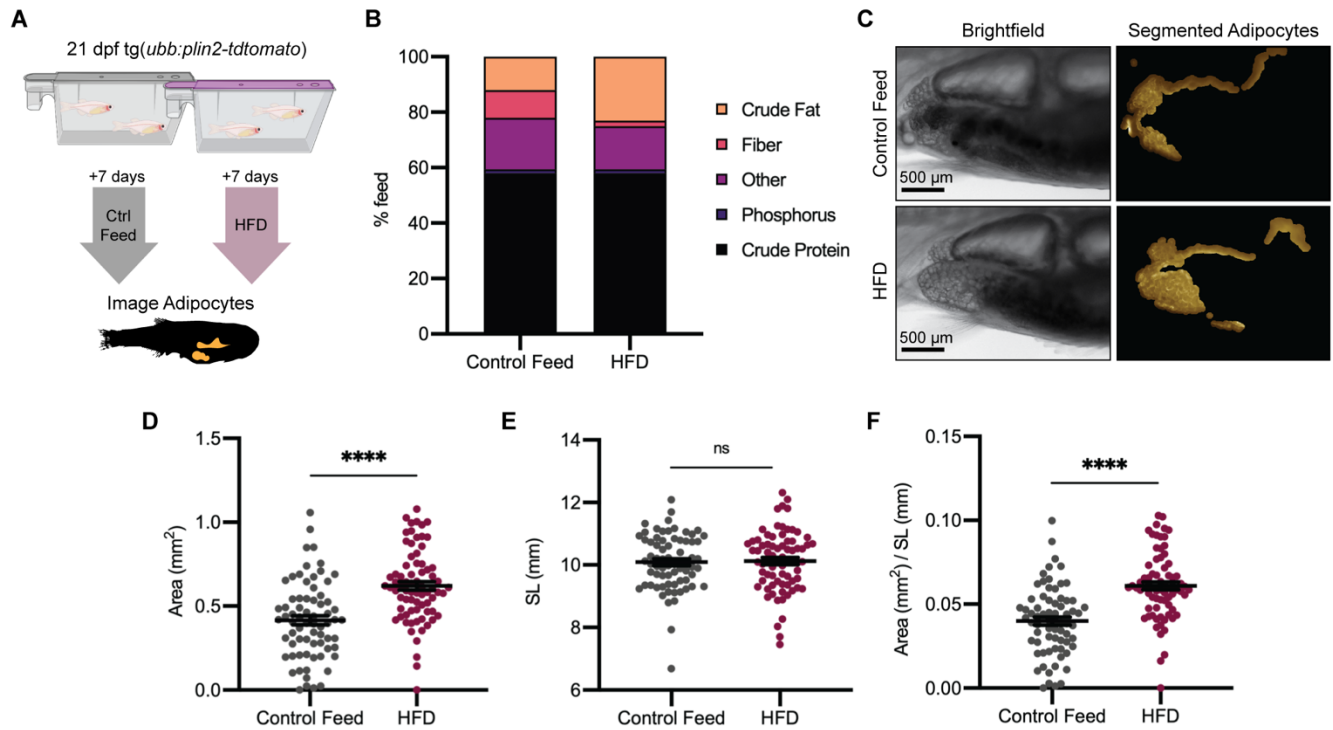

394 **Figure 4: High-fat diet leads to specific enlargement of visceral adipose tissue**

395

396 (A) Schematic of experimental set-up for high-fat diet (HFD) experiment. 21 dpf *tg(ubb:plin2-*  
397 *tdtomato)* were fed control feed or HFD for 7 days and imaged to measure standard length and  
398 adipose area. (B) Percent breakdown of nutritional content for control feed and HFD. (C)  
399 Representative images of *tg(ubb:plin2-tdtomato)* fed either control feed or HFD. Panels show  
400 images in brightfield and adipocyte segmentation. Image analysis pipeline resulted in  
401 measurements of adipose tissue (D) area, (E) standard length, and (F) area/standard length. Data  
402 points indicate individual fish for N = 3 independent experiments; Control feed n = 70; HFD n =  
403 74. Bars indicate mean and SEM. Significance calculated via Mann-Whitney test; \*\*\*\* p<0.0001.

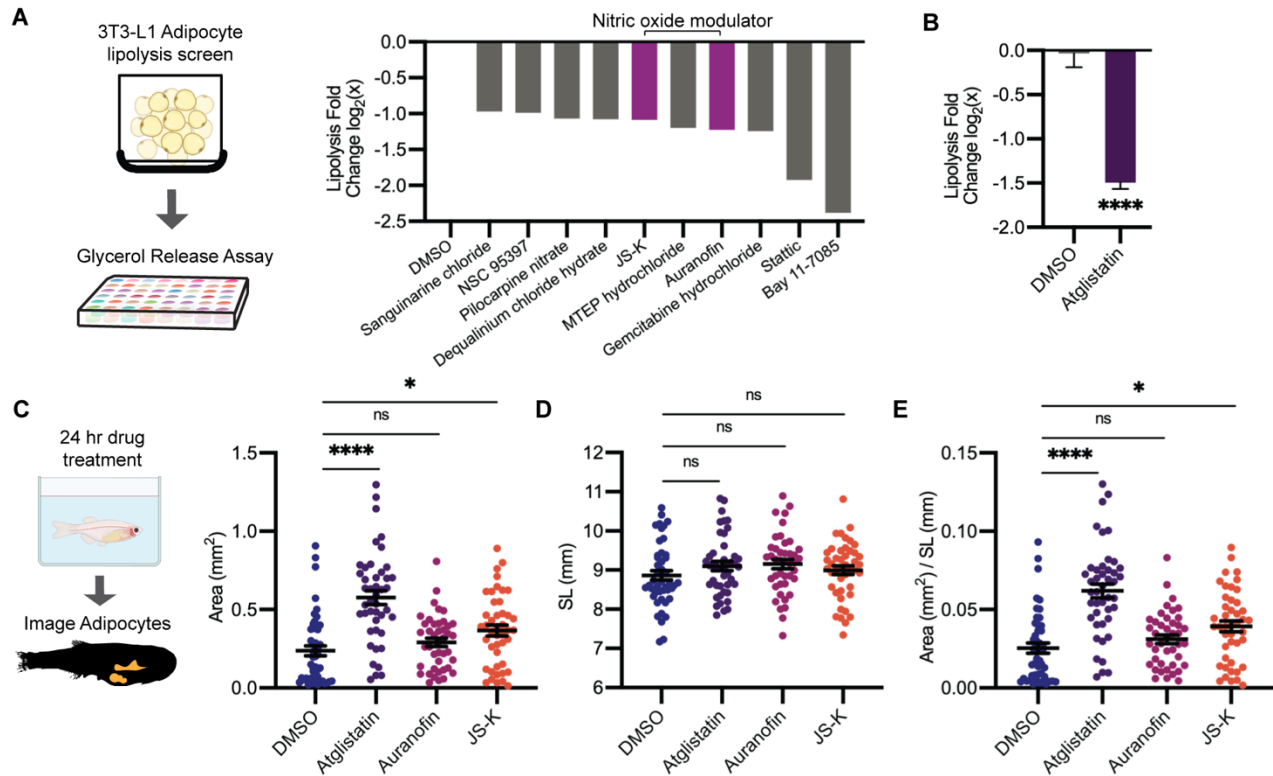

404 **Figure 5: A screen to discover novel compounds that modulate lipolysis and lipid**  
 405 **droplets *in vivo***  
 406

407 (A) Schematic of pharmacologic lipolysis screen in 3T3-L1 adipocytes using a glycerol release  
 408 assay. Normalized values  $\log_2$  transformed values for top ten drugs that inhibit lipolysis shown.  
 409 Magenta indicates compounds that modulate nitric oxide. (B) Normalized values  $\log_2$  transformed  
 410 values for lipolysis inhibition in 3T3-L1 adipocytes using either DMSO or 100  $\mu$ M Atglistatin. N =  
 411 5 independent experiments. Bars indicate mean and SEM. Significance calculated via unpaired  
 412 t-test; \*\*\*\* $p < 0.0001$ . (C) Schematic of experimental set-up for drug treatment. 21 dpf *tg(ubb:plin2-*  
 413 *tdtomato)* were individually placed in 6 well plates with either DMSO, 40  $\mu$ M Atglistatin, 1  $\mu$ M  
 414 Auranofin, 1  $\mu$ M JS-K for 24 hours. Adipose tissue was imaged and analyzed for (C) area, (D)  
 415 standard length, and (E) area/standard length. Data points indicate individual fish for N = 4  
 416 independent experiments; DMSO n = 47; Atglistatin n = 44; Auranofin n = 42; JS-K n = 44. Bars  
 417 indicate mean and SEM. Significance calculated via Kruskal-Wallis test; \*  $p < 0.05$ ; \*\*\*\*  $p < 0.0001$ .

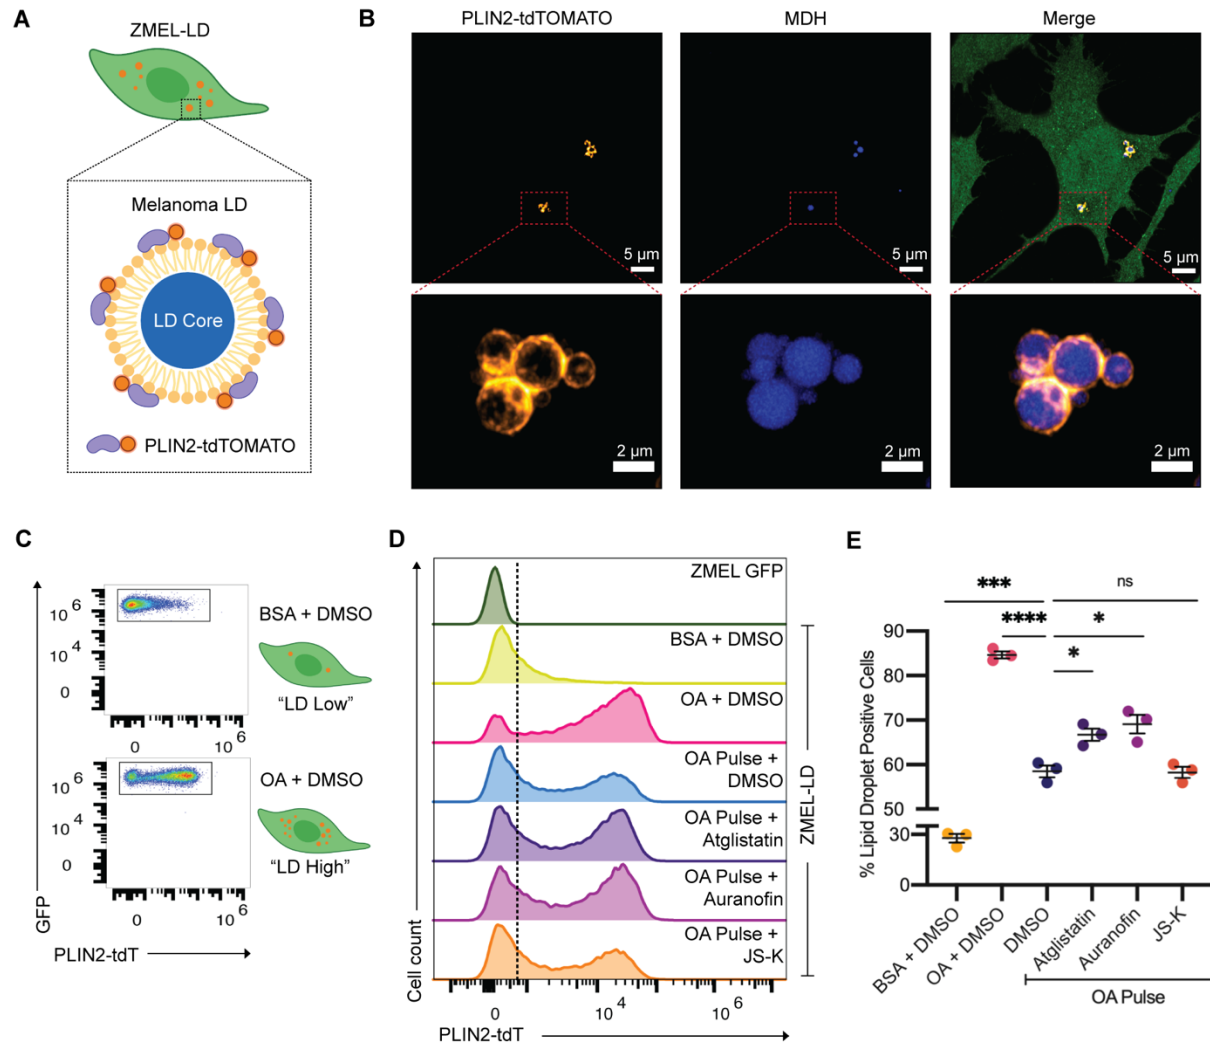

418 **Figure 6: Lipolysis modulators also inhibit lipid droplet loss in melanoma cells**

419  
 420 (A) Schematic of zebrafish melanoma cell line with lipid droplet reporter (ZMEL-LD) with lipid  
 421 droplet labeled by PLIN2-tdTOMATO. (B) Confocal images of ZMEL-LD cells after 24 hours of  
 422 oleic acid. Panels show fluorescence signal in PLIN2-tdTOMATO, MDH (lipid droplet dye) staining  
 423 and merge of images with cytoplasmic GFP. Red box indicates position of higher magnification  
 424 image of lipid droplets. (C) ZMEL-LD cells were treated with either BSA or oleic acid with DMSO  
 425 for 72 hours then analyzed by FACS for PLIN2-tdTOMATO expression. (D) Representative  
 426 histogram of PLIN2-tdTOMATO expression of ZMEL GFP and GFP+ ZMEL-LD cells with  
 427 indicated drugs. Dashed line shows threshold for PLIN2-tdTOMATO expression. (E)  
 428 Quantification of percent of GFP+ ZMEL-LD cells with lipid droplets. Lipid droplet low and high  
 429 controls were ZMEL-LD cells treated with BSA or oleic acid for 72 hours. For drug treatments,  
 430 ZMEL-LD cells were pulsed with oleic acid for 24 hours then given DMSO, 40  $\mu$ M Atglistatin, 0.5  
 431  $\mu$ M Auranofin, or 0.5  $\mu$ M JS-K for 48 hours. N = 3 independent experiments. Bars indicate mean  
 432 and SEM. Significance calculated via unpaired t-test; \* $p$ <0.05; \*\*\* $p$ <0.001; \*\*\*\* $p$ <0.0001.

433 **Movie 1: 3D Reconstruction of ZMEL-LD Lipid Droplet**

434

435 ZMEL-LD cells were given oleic acid for 24 hours, fixed and stained with the lipid droplet dye  
436 MDH. This movie is a 3D reconstruction of 37 planes covering a 6  $\mu\text{m}$  stack of a lipid droplet  
437 cluster in a ZMEL-LD cell. PLIN2-tdTOMATO (orange) is located outside of the lipid droplet core  
438 (blue).

## 439 **Materials and Methods**

440

### 441 Cloning of *ubb:plin2-tdtomato*

442 To clone the *plin2* cDNA, tissue from the muscle and heart of adult *casper* zebrafish was  
443 dissected, pooled and then RNA was isolated using the Zymogen Quick RNA Miniprep Kit  
444 (Zymo Research, Irvine, USA, Catalog #R1054) according to manufacturer instructions. The  
445 Invitrogen SuperScriptIII First-Strand Synthesis SuperMix Kit (Thermo Fisher, Waltham, USA  
446 Catalog #18080400) was used according to manufacturer instructions to produce cDNA.  
447 CloneAmp HiFi PCR Premix (Takara, Mountain View, USA, Catalog #639298) was used to PCR  
448 amplify the PLIN2 cDNA and gel purified via NucleoSpin Gel and PCR Clean Up (Takara,  
449 Mountain View, USA, Catalog #740609.50). To generate pME-PLIN2-tdTOMATO, the PLIN2  
450 cDNA was inserted on the 5' end of pME-tdTOMATO using In-Fusion HD Cloning Plus (Takara,  
451 Mountain View, USA, Catalog #638920). Gateway cloning using the Gateway LR Clonase  
452 Enzyme mix (Thermo Fisher, Waltham, USA Catalog #11791019) was employed to create the  
453 *ubb:plin2-tdtomato* construct with p5E-*ubb*, pME-PLIN2-tdTOMATO, p3E-polyA into the  
454 pDestTol2pA2-blastocidin (cells) (Heilmann et al., 2015) or pDestTol2CG2 (zebrafish) (Kwan et  
455 al., 2007).

456

### 457 Primers

| Primer name          | Primer Sequence                            |
|----------------------|--------------------------------------------|
| Plin2 cDNA Fwd       | AAAGCAGGCTCCACCATGAGCTTTCTTCTGTACTTGAAACTG |
| Plin2 cDNA Rev       | GCCCTTGCTCACCATTTTCAGTGACTTGAAGGGTCCTCTGT  |
| Plin2-TMT Fwd        | GCCGCCCCCTTCACCATGAGCTTTCTTCTGTACTTGAAAC   |
| Plin2-TMT Rev        | GCCCTTGCTCACCATTTTCAGTGACTTG               |
| Tomato ME Plin2 Fwd  | ATGGTGAGCAAGGGCGAG                         |
| Tomato ME Plin 2 Rev | GGTGAAGGGGGCGGC                            |

458

459

### 460 Zebrafish Husbandry

461 All zebrafish experiments were carried out in accordance with institutional animal protocols. All  
462 zebrafish were housed in a temperature (28.5°C) and light-controlled (14 hours on, 10 hours off)  
463 room. Fish were initially housed at a density of 5 fish per liter and fed 3 times per day using  
464 rotifers and pelleted zebrafish food. All anesthesia was done using Tricaine (Western Chemical  
465 Incorporated, Ferndale, USA) with a stock of 4 g/L (protected for light) and diluted until the fish  
466 was immobilized. All procedures were approved by and adhered to Institutional Animal Care  
467 and Use Committee (IACUC) protocol #12-05-008 through Memorial Sloan Kettering Cancer  
468 Center.

469

### 470 Generation of *tg(ubb:plin2-tdtomato)*

471 The *ubb:plin2-tdtomato* plasmid was injected into *casper* embryos with Tol2 mRNA to introduce  
472 stable integration of the *ubb:plin2-tdtomato* cassette. Fish with GFP+ hearts (due to  
473 pDestTol2CG) were selected and outcrossed to *casper* fish to produce the F1 generation. F1  
474 zebrafish with GFP+ hearts and validated PLIN2-tdTOMATO expressing adipocytes were  
475 outcrossed to generate F2 generation zebrafish for experiments.

476

### 477 Zebrafish Imaging and Analysis

478 Zebrafish were imaged using an upright Zeiss AxioZoom V16 Fluorescence Stereo Zoom  
479 Microscope with a 0.5x (for adult fish) or 1.0x (for juvenile fish) adjustable objective lens  
480 equipped with a motorized stage, brightfield, and GFP and tdTomato filter sets. To acquire  
481 images, zebrafish were lightly anesthetized with 0.2% Tricaine. Images were acquired with the



482 Zeiss Zen Pro v2 and exported as CZI files for visualization using FIJI or analysis using FIJI (to  
483 manually quantify standard length) and MATLAB (Mathworks, Natick, USA).

484

485 Our adipocyte segmentation approach utilized the Image Processing Toolbox within MATLAB.  
486 Because the zebrafish gut is highly autofluorescent, we chose a threshold for the GFP channel  
487 to categorize as background signal and subtracted it from a determined threshold for the  
488 tdTOMATO channel. We used a set size to crop images around the tdTOMATO positive signal  
489 and created a mask for the adipose tissue. Within the masked area, we applied a higher  
490 tdTOMATO threshold to segment the fluorescent signal from the adipocytes. Finally, we  
491 quantified the number of pixels above the threshold to quantify adipose tissue area. For  
492 visualization purposes, the segmented images were color filtered on Adobe Photoshop from  
493 grayscale to gold color scale.

494

#### 495 BODIPY staining of zebrafish

496 Adult zebrafish were placed in tanks and juvenile zebrafish were placed in p1000 tip boxes with  
497 either DMSO or 10 ng/ $\mu$ L BODIPY 493/503 (Thermo Fisher, Waltham, USA, Catalog #D3922)  
498 for 30 mins in the dark. Fish were washed then placed in new tanks with fresh water for 1 hour.  
499 Fish were washed again to remove any residual BODIPY then anesthetized and imaged as  
500 indicated above for whole adipose tissue.

501

502 Higher resolution images of zebrafish adipocytes were acquired using the Zeiss LSM 880  
503 inverted confocal microscope with using a 10x objective. Zebrafish were lightly anesthetized  
504 with 0.2% Tricaine and mounted on a glass bottom dish (MatTek, Ashland, USA, Catalog  
505 #P35G-1.5-20-C) with 0.1% low gelling agarose (Sigma-Aldrich, St. Louis, USA, Catalog,  
506 #A9045-25G).

507

#### 508 IHC for tdTOMATO

509 Zebrafish were sacrificed in an ice bath for at least 15 minutes. For adults, zebrafish tails were  
510 dissected. For juvenile zebrafish, the entire fish was used for fixation. Selected zebrafish were  
511 fixed in 4% paraformaldehyde for 72 hours at 4°C, washed in 70% ethanol for 24 hours, and  
512 then paraffin embedded. Fish were sectioned at 5  $\mu$ m and placed on Apex Adhesive slides,  
513 baked at 60°C, and then stained with antibodies against tdTomato (1:500, Rockland, #600-401-  
514 379). All histology was performed and stained by Histowiz.

515

#### 516 Juvenile Zebrafish Fast

517 *tg(ubb:plin2-tdtomato)* F1 fish were outcrossed to *caspers* to generate the F2 generation. F2  
518 fish were raised at a standard density of 25 fish per 2.8 L tank. At 21 dpf, fish were separated  
519 into new tanks which received standard feed or were fasted for 2.5 days. Fish were  
520 anesthetized with tricaine and imaged as described above to quantify visceral adipose tissue  
521 area and standard length.

522

#### 523 High-fat diet feeding

524 *tg(ubb:plin2-tdtomato)* F2 zebrafish were raised at a standard density of 25 fish per 2.8 L tank.  
525 At 21 dpf, the zebrafish were placed into 0.8L tanks and fed either a high fat or control diet  
526 (Sparos, Portugal) for 7 days. Fish were then imaged for Plin2-tdtomato expression at 28 dpf.  
527 Prior to imaging, fish put in a new tank and food withheld for ~16-20 hours. Zebrafish were at  
528 equal density for control and experimental groups, ranging from 15-30 fish per tank. Fish were  
529 fed 0.1 g feed per tank per day split over two feedings. The high fat and control diets were  
530 customized and produced at Sparos Lda (Olhão, Portugal), where powder ingredients were  
531 initially mixed according to each target formulation in a double-helix mixer, being thereafter  
532 ground twice in a micropulverizer hammer mill (SH1, Hosokawa-Alpine, Germany). The oil

533 fraction of the formulation was subsequently added and diets were humidified and agglomerated  
534 through low-shear extrusion (Dominioni Group, Italy). Upon extrusion, diets were dried in a  
535 convection oven (OP 750-UF, LTE Scientifics, United Kingdom) for 4 h at 60 °C, being  
536 subsequently crumbled (Neuero Farm, Germany) and sieved to 400 microns. Experimental diets  
537 were analyzed for proximal composition. The Sparos control diet contains 30% fishmeal, 33%  
538 squid meal, 5% fish gelatin, 5.5% wheat gluten, 12% cellulose, 2.5% Soybean oil, 2.5%  
539 rapeseed oil, 2% vitamins and minerals, 0.1% vitamin E, 0.4% antioxidant, 2% monocalcium  
540 phosphate, and 2.2% calcium silicate. The Sparos HFD contains 30% fishmeal, 33% squid  
541 meal, 5% fish gelatin, 5.5% wheat gluten, 12% palm oil, 2.5% soybean oil, 2.5% rapeseed oil,  
542 2% vitamins and minerals, 0.1% vitamin E, 0.4% antioxidant, 2% monocalcium phosphate, and  
543 2.2% calcium silicate.

#### 544 545 3T3-L1 Cell Culture

546 3T3-L1 cells were acquired from ZenBio and followed their differentiation protocol. Cells are  
547 received at Passage 8 and split to a maximum of Passage 12 as per recommendation of the  
548 company. 96-well plates were coated with fibronectin (EMD Millipore, Burlington, USA, Catalog  
549 #FC010) diluted 1:100 in PBS for at least 30 minutes to promote improved adherence of cells to  
550 the dish. 3T3-L1 cells are first cultured in PM-1-L1 Preadipocyte Medium and allowed to grow to  
551 100% confluence. PM-1-L1 media is changed every 48-72 hours. 48 hours after reaching 100%  
552 confluence, cells were changed to DM-1-L1 Differentiation Medium for 72 hours and then  
553 changed to AM-1-L1 Adipocyte Media. AM-1-L1 Adipocyte Media was changed every 48-72  
554 hours. Once in AM-1-L1, media is changed gently with a multichannel pipette and only 150µL of  
555 the 200µL is replaced to prevent touching the bottom of the well with the pipette tip. After 2-3  
556 weeks in AM-1-L1, the 3T3-L1 develop significantly large lipid droplets and were used in the  
557 screen.

#### 558 559 LOPAC Library Screen

560 The LOPAC library includes 1280 clinically relevant compounds with annotated targets or  
561 pathways. The workflow of the screen involved drug or vehicle control of the 3T3-L1 adipocytes  
562 for 24hrs in serum free media. After 24 hours, 100 µL of the media supernatant was collected to  
563 measure secreted glycerol using the Free Glycerol Reagent (Sigma-Aldrich, St. Louis, USA,  
564 Catalog F6428) and following the associated glycerol assay protocol.

565  
566 Media (screen media) used for drug treatment was phenol-free DMEM supplemented with 0.2%  
567 BSA FFA-free (Sigma-Aldrich, St. Louis, USA, Catalog 9048-46-8). The 1280 compounds were  
568 aliquoted as 2 µL at 1 mM into 16x 96-well plates and stored at -20C. Upon thawing, 198 µL of  
569 screen media was added to the well, bringing the final drug concentration for all compounds in  
570 the screen to 10 µM. Control vehicle was 1% DMSO served as a negative control and 1uM  
571 Isoproterenol served as a positive control in the screen. This media containing LOPAC drugs,  
572 DMSO, and Isoproterenol was transferred to 3T3-L1 cells and incubated for 24 hours.

573  
574 To measure glycerol release as a readout for lipolysis, 100 µL of Free Glycerol Reagent was  
575 aliquoted per well of a 96 well plate. 10 µL of supernatant media from 3T3-L1 adipocytes was  
576 then added to each well. A standard curve was produced by using Glycerol Standard Solution  
577 (Sigma-Aldrich, St. Louis, USA, Catalog G7793). The plate is incubated at 37C for 5 minutes  
578 and then developed with a plate reader set to detect absorbance at 540 nm. Using the standard  
579 curve, a fit equation is developed in Excel to convert the absorbance values into glycerol  
580 concentration. To take into account differences that occur in wells on the edge versus middle of  
581 the plate, all well positions across all plates in the screen are averaged to create a normalization  
582 factor for any given position on the plate. These normalized values were then used to determine  
583 top hits for compounds either that block lipolysis.

584  
585  
586  
587  
588  
589  
590  
591  
592  
593  
594  
595  
596  
597  
598  
599  
600  
601  
602  
603  
604  
605  
606  
607  
608

#### Glycerol Release Assay with Atglistatin

3T3-L1s were differentiated on a fibronectin-coated 96-well dish. At the start of the lipolysis experiment, 3T3-L1s were changed to serum-free DMEM supplemented with 0.2% BSA FFA-free (Sigma-Aldrich, St. Louis, USA, Catalog 9048-46-8). The media was supplemented with 1% DMSO for negative control or 1 $\mu$ M isoproterenol to induce lipolysis +/- 100  $\mu$ M Atglistatin (Sigma-Aldrich, St. Louis, USA, Catalog SML1075) to block lipolysis and cells were incubated for 24 hours.

To measure glycerol release, 100  $\mu$ L of Free Glycerol Reagent was aliquoted per well of a new 96 well plate. 10  $\mu$ L of supernatant media from 3T3-L1 adipocytes was then added to each well. A standard curve was produced by using Glycerol Standard Solution (Sigma-Aldrich, St. Louis, USA, Catalog G7793). The plate is incubated at 37C for 5 minutes and then developed with a plate reader set to detect absorbance at 540 nm. Using the standard curve, a fit equation is developed in Excel to convert the absorbance values into glycerol concentration.

#### Juvenile Zebrafish Drug Treatments

*tg(ubb:plin2-tdtomato)* F1 fish were outcrossed to *caspers* to generate the F2 generation. F2 fish were raised at a standard density of 50 fish per 6.0L tank. For drug treatment, fish were removed from the system at 21 dpf and placed at a density of 1 fish per well in a 6 well plate with 10 mL of E3 per well. After a 24 hour incubation with the drug fish were anesthetized with Tricaine and imaged using the described protocol to quantify (1) Standard length and (2) area of PLIN2-tdTOMATO expression corresponding to visceral adipose tissue area. Fish were treated with the following compounds, which were all dissolved in DMSO.

| Compound    | Dose       | Source                                                   |
|-------------|------------|----------------------------------------------------------|
| Forskolin   | 5 $\mu$ M  | Sigma-Aldrich, St. Louis, USA, Catalog, Catalog #F6886   |
| Auranofin   | 1 $\mu$ M  | Sigma-Aldrich, St. Louis, USA, Catalog, Catalog #A6733   |
| JS-K        | 1 $\mu$ M  | Sigma-Aldrich, St. Louis, USA, Catalog, Catalog #J4137   |
| Atglistatin | 40 $\mu$ M | Sigma-Aldrich, St. Louis, USA, Catalog, Catalog #SML1075 |

609  
610  
611  
612  
613  
614  
615  
616  
617  
618  
619  
620  
621  
622  
623  
624

#### Generation of ZMEL-LD Cell Line

The ZMEL zebrafish melanoma cell line was derived from a tumor of a *mitfa:BRAF<sup>V600E</sup>/p53<sup>-/-</sup>* zebrafish was described previously (Heilmann et al., 2015). ZMEL cells constitutively express eGFP driven by the *mitfa* promoter(Heilmann et al., 2015). ZMEL cells were grown at 28°C in a humidified incubator in DMEM (Gibco, Waltham, USA, Catalog, #11965) supplemented with 10% FBS (Gemini Bio, #100-500), 1X penicillin/streptomycin/glutamine (Gibco, Waltham, USA, Catalog, #10378016), and 1X GlutaMAX (Gibco, Waltham, USA, Catalog, #35050061). To generate the ZMEL-LD cells, ZMEL cells were nucleofected with the *ubb:plin2-tdtomato* plasmid using the Neon Transfection System (Thermo Fisher, Waltham, USA, Catalog #MPK10096), selected for two weeks in blasticidine supplemented media at 4  $\mu$ g/ $\mu$ L (Sigma-Aldrich, St. Louis, USA, Catalog, #15205-25MG), and FACS sorted for GFP and tdTOMATO double positive cells.

#### ZMEL-LD Imaging

8 well Nunc Lab-Tek Chambered Coverglass was coated with 1:100 dilution of fibronectin in DPBS (Millipore Sigma, Burlington, USA, Catalog #FC010-5MG) for 30 mins and then washed

625 with DPBS (Thermo Scientific, Waltham, USA, Catalog, #14190-250). ZMEL-LD cells were  
626 seeded at 30,000 cells per well and left to adhere for 24 hours. Media supplemented with 250  
627  $\mu\text{M}$  oleic acid (Sigma-Aldrich, St. Louis, USA, Catalog, #O3008-5ML) was added for 24 hours.  
628 Cells were fixed with 2% paraformaldehyde (Santa Cruz Biotechnology, Santa Cruz, USA,  
629 Catalog #sc-281692) for 45 minutes, washed with DPBS and permeabilized with 0.1% triton-X  
630 (Thermo Fisher, Waltham, USA, Catalog #PI85111) for 30 minutes at room temperature. To  
631 stain for lipid droplets, cells were washed and stained with 1:500 MDH (Abcepta, San Diego,  
632 USA, Catalog #SM1000a) for 15 minutes. Cells were imaged on the Zeiss LSM 880 inverted  
633 confocal microscope with AiryScan using a 63x oil immersion objective. Confocal stacks were  
634 visualized via FIJI and 3D reconstruction was created using Imaris (Bitplane Inc, Concord,  
635 USA).

#### 637 ZMEL-LD FACS Analysis

638 ZMEL Dark (no fluorescence), ZMEL-GFP, ZMEL-LD cells were plated on fibronectin coated 6  
639 well plates at a density of 500,000 cells in 1 mL of media per well. At 24 hours after plating, cells  
640 were given either 150  $\mu\text{M}$  of BSA or oleic acid with 1  $\mu\text{L}$  of DMSO. At 48 and 72 hours after  
641 plating, lipid droplet low and high controls were switched to fresh media with 150  $\mu\text{M}$  of BSA or  
642 oleic acid with 1  $\mu\text{L}$  of DMSO. Cells pulsed with oleic acid received fresh media with 150 150  
643  $\mu\text{M}$  of BSA with either 40  $\mu\text{M}$  Atglistatin, 0.5  $\mu\text{M}$  Auranofin or 0.5  $\mu\text{M}$  JS-K. At 96 hours after  
644 plating, cells were trypsinized, washed with DPBS and resuspended in DMEM supplemented  
645 with 2% FBS, 1X penicillin/streptomycin/glutamine, and 1X GlutaMAX. Cells were stained for  
646 viability with 1:1000 DAPI and strained through the Falcon FACS Tube with Cell Strainer Cap  
647 (Thermo Fisher, Waltham, USA Catalog, #08-771-23). Data was acquired via the Beckman  
648 Coulter CytoFLEX Flow Cytometer (Beckman Coulter, Miami, USA) and analyzed via FlowJo  
649 software (BD Biosciences, San Jose, USA).

#### 651 Schematics

652 Schematics and illustrations were generated via Biorender on biorender.com.

#### 654 Statistics

655 All statistical analysis was performed using GraphPad Prism 8 (Graphpad, San Diego, USA).  
656 Data are presented as mean  $\pm$  standard error (SEM).  $P < 0.05$  was considered statistically  
657 significant. Statistical tests used were Mann-Whitney, Kruskal-Wallis or unpaired t-tests which  
658 are noted in the figure legend. All experiments were done with at least 3 independent replicates.  
659 For *in vivo* experiments, N denotes number of independent experiments while n denotes  
660 number of individual fish. Imaging analysis utilized FIJI, Imaris, MATLAB software.

661 **References**

- 662
- 663 Ahmadian, M., Abbott, Marcia J., Tang, T., Hudak, Carolyn S. S., Kim, Y., Bruss, M., Hellerstein,  
664 Marc K., Lee, H.-Y., Samuel, Varman T., Shulman, Gerald I., Wang, Y., Duncan,  
665 Robin E., Kang, C., & Sul, Hei S. (2011). Desnutrin/ATGL Is Regulated by AMPK and Is  
666 Required for a Brown Adipose Phenotype. *Cell Metabolism*, 13(6), 739-748.  
667 doi:<https://doi.org/10.1016/j.cmet.2011.05.002>
- 668 Bailey, Andrew P., Koster, G., Guillermier, C., Hirst, Elizabeth M. A., MacRae, James I.,  
669 Lechene, Claude P., Postle, Anthony D., & Gould, Alex P. (2015). Antioxidant Role for  
670 Lipid Droplets in a Stem Cell Niche of Drosophila. *Cell*, 163(2), 340-353.  
671 doi:<https://doi.org/10.1016/j.cell.2015.09.020>
- 672 Balaban, S., Shearer, R. F., Lee, L. S., van Geldermalsen, M., Schreuder, M., Shtein, H. C.,  
673 Cairns, R., Thomas, K. C., Fazakerley, D. J., Grewal, T., Holst, J., Saunders, D. N., &  
674 Hoy, A. J. (2017). Adipocyte lipolysis links obesity to breast cancer growth: adipocyte-  
675 derived fatty acids drive breast cancer cell proliferation and migration. *Cancer &*  
676 *Metabolism*, 5(1), 1. doi:10.1186/s40170-016-0163-7
- 677 Barba, G., Harper, F., Harada, T., Kohara, M., Goulinet, S., Matsuura, Y., Eder, G., Schaff, Z.,  
678 Chapman, M. J., Miyamura, T., & Bréchet, C. (1997). Hepatitis C virus core protein  
679 shows a cytoplasmic localization and associates to cellular lipid storage droplets.  
680 *Proceedings of the National Academy of Sciences*, 94(4), 1200.  
681 doi:10.1073/pnas.94.4.1200
- 682 Bensaad, K., Favaro, E., Lewis, Caroline A., Peck, B., Lord, S., Collins, Jennifer M., Pinnick,  
683 Katherine E., Wigfield, S., Buffa, Francesca M., Li, J.-L., Zhang, Q., Wakelam, Michael J.  
684 O., Karpe, F., Schulze, A., & Harris, Adrian L. (2014). Fatty Acid Uptake and Lipid  
685 Storage Induced by HIF-1 $\alpha$  Contribute to Cell Growth and Survival after Hypoxia-  
686 Reoxygenation. *Cell Reports*, 9(1), 349-365.  
687 doi:<https://doi.org/10.1016/j.celrep.2014.08.056>
- 688 Berry, R., Church, C. D., Gericke, M. T., Jeffery, E., Colman, L., & Rodeheffer, M. S. (2014).  
689 Chapter Four - Imaging of Adipose Tissue. In O. A. Macdougald (Ed.), *Methods in*  
690 *Enzymology* (Vol. 537, pp. 47-73): Academic Press.
- 691 Berry, R., & Rodeheffer, M. S. (2013). Characterization of the adipocyte cellular lineage in vivo.  
692 *Nature Cell Biology*, 15(3), 302-308. doi:10.1038/ncb2696
- 693 Bosch, M., Sánchez-Álvarez, M., Fajardo, A., Kapetanovic, R., Steiner, B., Dutra, F., Moreira,  
694 L., López, J. A., Campo, R., Marí, M., Morales-Paytuví, F., Tort, O., Gubern, A., Templin,  
695 R. M., Curson, J. E. B., Martel, N., Català, C., Lozano, F., Tebar, F., Enrich, C.,  
696 Vázquez, J., Del Pozo, M. A., Sweet, M. J., Bozza, P. T., Gross, S. P., Parton, R. G., &  
697 Pol, A. (2020). Mammalian lipid droplets are innate immune hubs integrating cell  
698 metabolism and host defense. *Science*, 370(6514), eaay8085.  
699 doi:10.1126/science.aay8085
- 700 Bosma, M. (2016). Lipid droplet dynamics in skeletal muscle. *Experimental Cell Research*,  
701 340(2), 180-186. doi:<https://doi.org/10.1016/j.yexcr.2015.10.023>
- 702 Cabodevilla, A. G., Sánchez-Caballero, L., Nintou, E., Boiadjeva, V. G., Picatoste, F., Gubern,  
703 A., & Claro, E. (2013). Cell survival during complete nutrient deprivation depends on lipid  
704 droplet-fueled  $\beta$ -oxidation of fatty acids. *The Journal of biological chemistry*, 288(39),  
705 27777-27788. doi:10.1074/jbc.M113.466656
- 706 Chi, J., Crane, A., Wu, Z., & Cohen, P. (2018). Adipo-Clear: A Tissue Clearing Method for  
707 Three-Dimensional Imaging of Adipose Tissue. *Journal of visualized experiments* :  
708 *JoVE*(137), 58271. doi:10.3791/58271
- 709 Chitraju, C., Mejhert, N., Haas, J. T., Diaz-Ramirez, L. G., Grueter, C. A., Imbriglio, J. E., Pinto,  
710 S., Koliwad, S. K., Walther, T. C., & Farese, R. V., Jr. (2017). Triglyceride Synthesis by

- 711 DGAT1 Protects Adipocytes from Lipid-Induced ER Stress during Lipolysis. *Cell*  
712 *Metabolism*, 26(2), 407-418.e403. doi:10.1016/j.cmet.2017.07.012
- 713 Chu, C.-Y., Chen, C.-F., Rajendran, R. S., Shen, C.-N., Chen, T.-H., Yen, C.-C., Chuang, C.-K.,  
714 Lin, D.-S., & Hsiao, C.-D. (2012). Overexpression of Akt1 Enhances Adipogenesis and  
715 Leads to Lipoma Formation in Zebrafish. *PLoS One*, 7(5), e36474.  
716 doi:10.1371/journal.pone.0036474
- 717 Duncan, R. E., Ahmadian, M., Jaworski, K., Sarkadi-Nagy, E., & Sul, H. S. (2007). Regulation of  
718 lipolysis in adipocytes. *Annual review of nutrition*, 27, 79-101.  
719 doi:10.1146/annurev.nutr.27.061406.093734
- 720 Fam, T. K., Klymchenko, A. S., & Collot, M. (2018). Recent Advances in Fluorescent Probes for  
721 Lipid Droplets. *Materials (Basel, Switzerland)*, 11(9), 1768. doi:10.3390/ma11091768
- 722 Farese, R. V., Jr., & Walther, T. C. (2009). Lipid Droplets Finally Get a Little R-E-S-P-E-C-T.  
723 *Cell*, 139(5), 855-860. doi:10.1016/j.cell.2009.11.005
- 724 Fischer, J., Lefèvre, C., Morava, E., Mussini, J.-M., Laforêt, P., Negre-Salvayre, A., Lathrop, M.,  
725 & Salvayre, R. (2007). The gene encoding adipose triglyceride lipase (PNPLA2) is  
726 mutated in neutral lipid storage disease with myopathy. *Nat Genet*, 39(1), 28-30.  
727 doi:10.1038/ng1951
- 728 Fox, C. S., Massaro, J. M., Hoffmann, U., Pou, K. M., Maurovich-Horvat, P., Liu, C.-Y., Vasan,  
729 R. S., Murabito, J. M., Meigs, J. B., Cupples, L. A., D'Agostino, R. B., & O'Donnell, C. J.  
730 (2007). Abdominal Visceral and Subcutaneous Adipose Tissue Compartments.  
731 *Circulation*, 116(1), 39-48. doi:doi:10.1161/CIRCULATIONAHA.106.675355
- 732 Fujimoto, M., Matsuzaki, I., Nishitsuji, K., Yamamoto, Y., Murakami, D., Yoshikawa, T., Fukui,  
733 A., Mori, Y., Nishino, M., Takahashi, Y., Iwahashi, Y., Warigaya, K., Kojima, F., Jinnin,  
734 M., & Murata, S.-i. (2020). Adipophilin expression in cutaneous malignant melanoma is  
735 associated with high proliferation and poor clinical prognosis. *Laboratory Investigation*,  
736 100(5), 727-737. doi:10.1038/s41374-019-0358-y
- 737 Fujimoto, T., & Parton, R. G. (2011). Not just fat: the structure and function of the lipid droplet.  
738 *Cold Spring Harbor perspectives in biology*, 3(3), a004838.  
739 doi:10.1101/cshperspect.a004838
- 740 Haemmerle, G., Lass, A., Zimmermann, R., Gorkiewicz, G., Meyer, C., Rozman, J., Heldmaier,  
741 G., Maier, R., Theussl, C., Eder, S., Kratky, D., Wagner, E. F., Klingenspor, M., Hoefler,  
742 G., & Zechner, R. (2006). Defective Lipolysis and Altered Energy Metabolism in Mice  
743 Lacking Adipose Triglyceride Lipase. *Science*, 312, 734-737.
- 744 Heid, H., Rickelt, S., Zimbelmann, R., Winter, S., Schumacher, H., Dörflinger, Y., Kuhn, C., &  
745 Franke, W. W. (2014). On the Formation of Lipid Droplets in Human Adipocytes: The  
746 Organization of the Perilipin–Vimentin Cortex. *PLoS One*, 9(2), e90386.  
747 doi:10.1371/journal.pone.0090386
- 748 Heilmann, S., Ratnakumar, K., Langdon, E. M., Kansler, E. R., Kim, I. S., Campbell, N. R.,  
749 Perry, E. B., McMahon, A. J., Kaufman, C. K., van Rooijen, E., Lee, W., Iacobuzio-  
750 Donahue, C. A., Hynes, R. O., Zon, L. I., Xavier, J. B., & White, R. M. (2015). A  
751 Quantitative System for Studying Metastasis Using Transparent Zebrafish. *Cancer*  
752 *Research*, 75(20), 4272. doi:10.1158/0008-5472.CAN-14-3319
- 753 Hellmér, J., Arner, P., & Lundin, A. (1989). Automatic luminometric kinetic assay of glycerol for  
754 lipolysis studies. *Analytical Biochemistry*, 177(1), 132-137.  
755 doi:[https://doi.org/10.1016/0003-2697\(89\)90027-4](https://doi.org/10.1016/0003-2697(89)90027-4)
- 756 Henne, W. M., Reese, M. L., & Goodman, J. M. (2018). The assembly of lipid droplets and their  
757 roles in challenged cells. *The EMBO journal*, 37(12), e98947.  
758 doi:10.15252/embj.201898947
- 759 Jarc, E., & Petan, T. (2019). Lipid Droplets and the Management of Cellular Stress. *The Yale*  
760 *journal of biology and medicine*, 92(3), 435-452. Retrieved from  
761 <https://pubmed.ncbi.nlm.nih.gov/31543707>

- 762 <https://www.ncbi.nlm.nih.gov/pmc/articles/PMC6747940/>  
763 Krahmer, N., Farese, R. V., Jr., & Walther, T. C. (2013). Balancing the fat: lipid droplets and  
764 human disease. *EMBO molecular medicine*, 5(7), 973-983.  
765 doi:10.1002/emmm.201100671  
766 Kühnlein, R. P. (2011). The contribution of the Drosophila model to lipid droplet research.  
767 *Progress in Lipid Research*, 50(4), 348-356.  
768 doi:<https://doi.org/10.1016/j.plipres.2011.04.001>  
769 Kuniyoshi, S., Miki, Y., Sasaki, A., Iwabuchi, E., Ono, K., Onodera, Y., Hirakawa, H., Ishida, T.,  
770 Yoshimi, N., & Sasano, H. (2019). The significance of lipid accumulation in breast  
771 carcinoma cells through perilipin 2 and its clinicopathological significance. *Pathology*  
772 *International*, 69(8), 463-471. doi:10.1111/pin.12831  
773 Kwan, K. M., Fujimoto, E., Grabher, C., Mangum, B. D., Hardy, M. E., Campbell, D. S., Parant,  
774 J. M., Yost, H. J., Kanki, J. P., & Chien, C.-B. (2007). The Tol2kit: A multisite gateway-  
775 based construction kit for Tol2 transposon transgenesis constructs. *Developmental*  
776 *Dynamics*, 236(11), 3088-3099. doi:10.1002/dvdy.21343  
777 Landgraf, K., Schuster, S., Meusel, A., Garten, A., Riemer, T., Schleinitz, D., Kiess, W., &  
778 Körner, A. (2017). Short-term overfeeding of zebrafish with normal or high-fat diet as a  
779 model for the development of metabolically healthy versus unhealthy obesity. *BMC*  
780 *Physiology*, 17(1), 4-4. doi:10.1186/s12899-017-0031-x  
781 Le Jemtel, T. H., Samson, R., Milligan, G., Jaiswal, A., & Oparil, S. (2018). Visceral Adipose  
782 Tissue Accumulation and Residual Cardiovascular Risk. *Current Hypertension Reports*,  
783 20(9), 77. doi:10.1007/s11906-018-0880-0  
784 Lengyel, E., Makowski, L., DiGiovanni, J., & Kolonin, M. G. (2018). Cancer as a Matter of Fat:  
785 The Crosstalk between Adipose Tissue and Tumors. *Trends Cancer*, 4(5), 374-384.  
786 doi:10.1016/j.trecan.2018.03.004  
787 Litosch, I., Hudson, T. H., Mills, I., Li, S. Y., & Fain, J. N. (1982). Forskolin as an activator of  
788 cyclic AMP accumulation and lipolysis in rat adipocytes. *Molecular Pharmacology*, 22(1),  
789 109-115. Retrieved from  
790 <https://molpharm.aspetjournals.org/content/molpharm/22/1/109.full.pdf>  
791 Liu, Z., Li, X., Ge, Q., Ding, M., & Huang, X. (2014). A Lipid Droplet-Associated GFP Reporter-  
792 Based Screen Identifies New Fat Storage Regulators in *C. elegans*. *Journal of Genetics*  
793 *and Genomics*, 41(5), 305-313. doi:<https://doi.org/10.1016/j.jgg.2014.03.002>  
794 Longo, Valter D., & Mattson, Mark P. (2014). Fasting: Molecular Mechanisms and Clinical  
795 Applications. *Cell Metabolism*, 19(2), 181-192.  
796 doi:<https://doi.org/10.1016/j.cmet.2013.12.008>  
797 Mayer, N., Schweiger, M., Romauch, M., Grabner, G. F., Eichmann, T. O., Fuchs, E., Ivkovic, J.,  
798 Heier, C., Mrak, I., Lass, A., Höfler, G., Fledelius, C., Zechner, R., Zimmermann, R., &  
799 Breinbauer, R. (2013). Development of small-molecule inhibitors targeting adipose  
800 triglyceride lipase. *Nature Chemical Biology*, 9(12), 785-787.  
801 doi:10.1038/nchembio.1359  
802 Minchin, J. E. N., & Rawls, J. F. (2017). A classification system for zebrafish adipose tissues.  
803 *Disease Models & Mechanisms*, 10(6), 797. doi:10.1242/dmm.025759  
804 Miyanari, Y., Atsuzawa, K., Usuda, N., Watashi, K., Hishiki, T., Zayas, M., Bartenschlager, R.,  
805 Wakita, T., Hijikata, M., & Shimotohno, K. (2007). The lipid droplet is an important  
806 organelle for hepatitis C virus production. *Nature Cell Biology*, 9(9), 1089-1097.  
807 doi:10.1038/ncb1631  
808 Nath, N., Chattopadhyay, M., Pospishil, L., Cieciora, L. Z., Goswami, S., Kodela, R., Saavedra,  
809 J. E., Keefer, L. K., & Kashfi, K. (2010). JS-K, a nitric oxide-releasing prodrug, modulates  
810  $\beta$ -catenin/TCF signaling in leukemic Jurkat cells: evidence of an S-nitrosylated  
811 mechanism. *Biochemical pharmacology*, 80(11), 1641-1649.  
812 doi:10.1016/j.bcp.2010.08.011

- 813 Nguyen, T. B., Louie, S. M., Daniele, J. R., Tran, Q., Dillin, A., Zoncu, R., Nomura, D. K., &  
814 Olzmann, J. A. (2017). DGAT1-Dependent Lipid Droplet Biogenesis Protects  
815 Mitochondrial Function during Starvation-Induced Autophagy. *Developmental Cell*, 42(1),  
816 9-21.e25. doi:10.1016/j.devcel.2017.06.003
- 817 Nieman, K. M., Kenny, H. A., Penicka, C. V., Ladanyi, A., Buell-Gutbrod, R., Zillhardt, M. R.,  
818 Romero, I. L., Carey, M. S., Mills, G. B., Hotamisligil, G. S., Yamada, S. D., Peter, M. E.,  
819 Gwin, K., & Lengyel, E. (2011). Adipocytes promote ovarian cancer metastasis and  
820 provide energy for rapid tumor growth. *Nat Med*, 17(11), 1498-1503.  
821 doi:10.1038/nm.2492
- 822 Oka, T., Nishimura, Y., Zang, L., Hirano, M., Shimada, Y., Wang, Z., Umemoto, N., Kuroyanagi,  
823 J., Nishimura, N., & Tanaka, T. (2010). Diet-induced obesity in zebrafish shares common  
824 pathophysiological pathways with mammalian obesity. *BMC Physiology*, 10(1), 21.  
825 doi:10.1186/1472-6793-10-21
- 826 Olzmann, J. A., & Carvalho, P. (2019). Dynamics and functions of lipid droplets. *Nature Reviews*  
827 *Molecular Cell Biology*, 20(3), 137-155. doi:10.1038/s41580-018-0085-z
- 828 Paar, M., Jüngst, C., Steiner, N. A., Magnes, C., Sinner, F., Kolb, D., Lass, A., Zimmermann, R.,  
829 Zumbusch, A., Kohlwein, S. D., & Wolinski, H. (2012). Remodeling of lipid droplets  
830 during lipolysis and growth in adipocytes. *The Journal of biological chemistry*, 287(14),  
831 11164-11173. doi:10.1074/jbc.M111.316794
- 832 Petan, T., Jarc, E., & Jusović, M. (2018). Lipid Droplets in Cancer: Guardians of Fat in a  
833 Stressful World. *Molecules (Basel, Switzerland)*, 23(8), 1941.  
834 doi:10.3390/molecules23081941
- 835 Rambold, A. S., Cohen, S., & Lippincott-Schwartz, J. (2015). Fatty acid trafficking in starved  
836 cells: regulation by lipid droplet lipolysis, autophagy, and mitochondrial fusion dynamics.  
837 *Developmental Cell*, 32(6), 678-692. doi:10.1016/j.devcel.2015.01.029
- 838 Rosen, Evan D., & Spiegelman, Bruce M. (2014). What We Talk About When We Talk About  
839 Fat. *Cell*, 156(1), 20-44. doi:10.1016/j.cell.2013.12.012
- 840 Schoiswohl, G., Schweiger, M., Schreiber, R., Gorkiewicz, G., Preiss-Landl, K., Taschler, U.,  
841 Zierler, K. A., Radner, F. P. W., Eichmann, T. O., Kienesberger, P. C., Eder, S., Lass, A.,  
842 Haemmerle, G., Alsted, T. J., Kiens, B., Hoefler, G., Zechner, R., & Zimmermann, R.  
843 (2010). Adipose triglyceride lipase plays a key role in the supply of the working muscle  
844 with fatty acids. *Journal of Lipid Research*, 51(3), 490-499. doi:10.1194/jlr.M001073
- 845 Schweiger, M., Romauch, M., Schreiber, R., Grabner, G. F., Hütter, S., Kotzbeck, P., Benedikt,  
846 P., Eichmann, T. O., Yamada, S., Knittelfelder, O., Diwojky, C., Doler, C., Mayer, N., De  
847 Cecco, W., Breinbauer, R., Zimmermann, R., & Zechner, R. (2017). Pharmacological  
848 inhibition of adipose triglyceride lipase corrects high-fat diet-induced insulin resistance  
849 and hepatosteatosis in mice. *Nature Communications*, 8(1), 14859.  
850 doi:10.1038/ncomms14859
- 851 Shami, P. J., Saavedra, J. E., Wang, L. Y., Bonifant, C. L., Diwan, B. A., Singh, S. V., Gu, Y.,  
852 Fox, S. D., Buzard, G. S., Citro, M. L., Waterhouse, D. J., Davies, K. M., Ji, X., & Keefer,  
853 L. K. (2003). JS-K, a Glutathione/Glutathione S-Transferase-activated Nitric Oxide Donor  
854 of the Diazeniumdiolate Class with Potent Antineoplastic Activity. *Molecular Cancer*  
855 *Therapeutics*, 2(4), 409-417. Retrieved from  
856 <https://mct.aacrjournals.org/content/molcanther/2/4/409.full.pdf>
- 857 Stamler, J. S., Lamas, S., & Fang, F. C. (2001). Nitrosylation: The Prototypic Redox-Based  
858 Signaling Mechanism. *Cell*, 106(6), 675-683. doi:[https://doi.org/10.1016/S0092-](https://doi.org/10.1016/S0092-8674(01)00495-0)  
859 [8674\(01\)00495-0](https://doi.org/10.1016/S0092-8674(01)00495-0)
- 860 Tang, H.-N., Tang, C.-Y., Man, X.-F., Tan, S.-W., Guo, Y., Tang, J., Zhou, C.-L., & Zhou, H.-D.  
861 (2017). Plasticity of adipose tissue in response to fasting and refeeding in male mice.  
862 *Nutrition & Metabolism*, 14(1), 3. doi:10.1186/s12986-016-0159-x



- 863 Tchernof, A., & Després, J.-P. (2013). Pathophysiology of Human Visceral Obesity: An Update.  
864 *Physiological Reviews*, 93(1), 359-404. doi:10.1152/physrev.00033.2011
- 865 Velázquez, A. P., Tatsuta, T., Ghillebert, R., Drescher, I., & Graef, M. (2016). Lipid droplet-  
866 mediated ER homeostasis regulates autophagy and cell survival during starvation. *The*  
867 *Journal of cell biology*, 212(6), 621-631. doi:10.1083/jcb.201508102
- 868 Verboven, K., Wouters, K., Gaens, K., Hansen, D., Bijnen, M., Wetzels, S., Stehouwer, C. D.,  
869 Goossens, G. H., Schalkwijk, C. G., Blaak, E. E., & Jocken, J. W. (2018). Abdominal  
870 subcutaneous and visceral adipocyte size, lipolysis and inflammation relate to insulin  
871 resistance in male obese humans. *Scientific Reports*, 8(1), 4677. doi:10.1038/s41598-  
872 018-22962-x
- 873 Vevea, Jason D., Garcia, Enrique J., Chan, Robin B., Zhou, B., Schultz, M., Di Paolo, G.,  
874 McCaffery, J. M., & Pon, Liza A. (2015). Role for Lipid Droplet Biogenesis and  
875 Microlipophagy in Adaptation to Lipid Imbalance in Yeast. *Developmental Cell*, 35(5),  
876 584-599. doi:<https://doi.org/10.1016/j.devcel.2015.11.010>
- 877 Vieyres, G., Reichert, I., Carpentier, A., Vondran, F. W. R., & Pietschmann, T. (2020). The  
878 ATGL lipase cooperates with ABHD5 to mobilize lipids for hepatitis C virus assembly.  
879 *PLOS Pathogens*, 16(6), e1008554. doi:10.1371/journal.ppat.1008554
- 880 Wang, H., Quiroga, A. D., & Lehner, R. (2013). Chapter 7 - Analysis of Lipid Droplets in  
881 Hepatocytes. In H. Yang & P. Li (Eds.), *Methods in Cell Biology* (Vol. 116, pp. 107-127):  
882 Academic Press.
- 883 White, R. M., Sessa, A., Burke, C., Bowman, T., LeBlanc, J., Ceol, C., Bourque, C., Dovey, M.,  
884 Goessling, W., Burns, C. E., & Zon, L. I. (2008). Transparent adult zebrafish as a tool for  
885 in vivo transplantation analysis. *Cell Stem Cell*, 2(2), 183-189.  
886 doi:10.1016/j.stem.2007.11.002
- 887 Xue, Y., Lim, S., Bräkenhielm, E., & Cao, Y. (2010). Adipose angiogenesis: quantitative  
888 methods to study microvessel growth, regression and remodeling in vivo. *Nature*  
889 *Protocols*, 5(5), 912-920. doi:10.1038/nprot.2010.46
- 890 Yamada, Y., Eto, M., Ito, Y., Mochizuki, S., Son, B.-K., Ogawa, S., Iijima, K., Kaneki, M., Kozaki,  
891 K., Toba, K., Akishita, M., & Ouchi, Y. (2015). Suppressive Role of PPAR $\gamma$ -Regulated  
892 Endothelial Nitric Oxide Synthase in Adipocyte Lipolysis. *PLoS One*, 10(8), e0136597.  
893 doi:10.1371/journal.pone.0136597
- 894 Zebisch, K., Voigt, V., Wabitsch, M., & Brandsch, M. (2012). Protocol for effective differentiation  
895 of 3T3-L1 cells to adipocytes. *Analytical Biochemistry*, 425(1), 88-90.  
896 doi:<https://doi.org/10.1016/j.ab.2012.03.005>
- 897 Zechner, R., Madeo, F., & Kratky, D. (2017). Cytosolic lipolysis and lipophagy: two sides of the  
898 same coin. *Nat Rev Mol Cell Biol*, 18(11), 671-684. doi:10.1038/nrm.2017.76
- 899 Zhang, M., Di Martino, J. S., Bowman, R. L., Campbell, N. R., Baksh, S. C., Simon-Vermot, T.,  
900 Kim, I. S., Haldeman, P., Mondal, C., Yong-Gonzales, V., Abu-Akeel, M., Merghoub, T.,  
901 Jones, D. R., Zhu, X. G., Arora, A., Ariyan, C. E., Birsoy, K., Wolchok, J. D., Panageas,  
902 K. S., Hollmann, T., Bravo-Cordero, J. J., & White, R. M. (2018). Adipocyte-Derived  
903 Lipids Mediate Melanoma Progression via FATP Proteins. *Cancer Discovery*, 8(8), 1006.  
904 doi:10.1158/2159-8290.CD-17-1371
- 905 Zimmermann, R., Strauss, J. G., Haemmerle, G., Schoiswohl, G., Birner-Gruenberger, R.,  
906 Riederer, M., Lass, A., Neuberger, G., Eisenhaber, F., Hermetter, A., & Zechner, R.  
907 (2004). Fat Mobilization in Adipose Tissue Is Promoted by Adipose Triglyceride Lipase.  
908 *Science*, 306, 1383-1386.  
909
